# Supplementary material for: Synthesis and Investigations of the Antitumor Effects of First-Row Transition Metal(II) Complexes Supported by Two Fluorinated and Non-Fluorinated β-Diketonates
Source: MDPI journal article supplement (doi:10.3390/ijms25042038), 2024-02-07
Supplement: s1 [file s1]

# Synthesis and Investigations of the Antitumor Effects of First-Row Transition Metal(II) Complexes Supported by Two Fluorinated and Non-Fluorinated $\beta$ -Diketonates

Maura Pellei <sup>1,\*</sup>, Jo' Del Gobbo <sup>1</sup>, Miriam Caviglia <sup>1</sup>, Valentina Gandin <sup>2</sup>, Cristina Marzano <sup>2,\*</sup>, Deepika V. Karade <sup>3</sup>, Anurag Noonikara Poyil <sup>3</sup>, H. V. Rasika Dias <sup>3</sup> and Carlo Santini <sup>1</sup>

<sup>1</sup> School of Science and Technology—Chemistry Division, University of Camerino, Via Madonna delle Carceri (ChIP), Camerino, 62032 Macerata, Italy

<sup>2</sup> Department of Pharmaceutical and Pharmacological Sciences, University of Padova, Via Marzolo 5, 35131 Padova, Italy

<sup>3</sup> Department of Chemistry and Biochemistry, The University of Texas at Arlington, P.O. Box 19065, Arlington, TX 76019, USA

\* Correspondence: maura.pellei@unicam.it (M.P.); cristina.marzano@unipd.it (C.M.)

## Table of Contents:

**Figure S1.** Two views of  $[\text{Cu}(\text{L}^{\text{Mes}})_2]$  (**11**).

**Figure S2.** Two views of  $[\text{Zn}(\text{L}^{\text{Mes}})_2]$  (**12**).

**Figure S3.** A view of  $[\text{Cu}(\text{L}^{\text{CF}_3})_2(\text{THF})]_2(\text{THF})$  showing THF and  $\text{CF}_3$  moiety disorder.

**Figure S4.** FT-IR spectrum of  $\text{NaL}^{\text{CF}_3}$ .

**Figure S5.**  $^1\text{H}$ -NMR spectrum of  $\text{NaL}^{\text{CF}_3}$  in  $\text{DMSO-d}_6$ .

**Figure S6.**  $^{13}\text{C}\{^1\text{H}\}$ -NMR spectrum of  $\text{NaL}^{\text{CF}_3}$  in  $\text{DMSO-d}_6$ .

**Figure S7.**  $^{19}\text{F}\{^1\text{H}\}$ -NMR spectrum of  $\text{NaL}^{\text{CF}_3}$  in  $\text{DMSO-d}_6$ .

**Figure S8.** ESI-MS(+) spectrum of  $\text{NaL}^{\text{CF}_3}$  in  $\text{CH}_3\text{CN}$ .

**Figure S9.** FT-IR spectrum of  $\text{NaL}^{\text{Mes}}$ .

**Figure S10.**  $^1\text{H}$ -NMR spectrum of  $\text{NaL}^{\text{Mes}}$  in  $\text{CDCl}_3$ .

**Figure S11.**  $^{13}\text{C}\{^1\text{H}\}$ -NMR of  $\text{NaL}^{\text{Mes}}$  in  $\text{CDCl}_3$ .

**Figure S12.** ESI-MS(+) spectrum of  $\text{NaL}^{\text{Mes}}$  in  $\text{CH}_3\text{OH}$ .

**Figure S13.** FT-IR spectrum of  $\text{NaL}^{\text{Ph}}$ .

**Figure S14.**  $^1\text{H}$ -NMR of  $\text{NaL}^{\text{Ph}}$  in Acetone- $\text{d}_6$ .

**Figure S15.**  $^{13}\text{C}\{^1\text{H}\}$ -NMR of  $\text{NaL}^{\text{Ph}}$  in Acetone- $\text{d}_6$ .

**Figure S16.** ESI-MS(+) spectrum of  $\text{NaL}^{\text{Ph}}$  in  $\text{CH}_3\text{OH}$ .

**Figure S17.** FT-IR spectrum of  $[\text{Mn}(\text{L}^{\text{CF}_3})_2(\text{H}_2\text{O})_2]$  (**1**).

**Figure S18.** ESI-MS(+) spectrum of  $[\text{Mn}(\text{L}^{\text{CF}_3})_2(\text{H}_2\text{O})_2]$  (**1**) in  $\text{CH}_3\text{OH}/\text{CH}_3\text{CN}$ .

**Figure S19.** FT-IR spectrum of  $[\text{Fe}(\text{L}^{\text{CF}_3})_2]$  (**2**).

**Figure S20.** ESI-MS(+) spectrum of  $[\text{Fe}(\text{L}^{\text{CF}_3})_2]$  (**2**) in  $\text{CH}_3\text{CN}$ .

**Figure S21.** FT-IR spectrum of  $[\text{Co}(\text{L}^{\text{CF}_3})_2(\text{H}_2\text{O})_2]$  (**3**).

**Figure S22.** ESI-MS(+) spectrum of  $[\text{Co}(\text{L}^{\text{CF}_3})_2(\text{H}_2\text{O})_2]$  (**3**) in  $\text{CH}_3\text{OH}/\text{CH}_3\text{CN}$ .

**Figure S23.** FT-IR spectrum of  $[\text{Ni}(\text{L}^{\text{CF}_3})_2(\text{H}_2\text{O})_2]$  (**4**).

**Figure S24.** ESI-MS(+) spectrum of  $[\text{Ni}(\text{L}^{\text{CF}_3})_2(\text{H}_2\text{O})_2]$  (**4**) in  $\text{CH}_3\text{OH}/\text{CH}_3\text{CN}$ .

**Figure S25.** FT-IR spectrum of  $[\text{Cu}(\text{L}^{\text{CF}_3})_2]$  (**5**).

**Figure S26.** ESI-MS(+) spectrum of  $[\text{Cu}(\text{L}^{\text{CF}_3})_2]$  (**5**) in  $\text{CH}_3\text{OH}/\text{CH}_3\text{CN}$ .

**Figure S27.** FT-IR spectrum of  $[\text{Zn}(\text{L}^{\text{CF}_3})_2]$  (**6**).

**Figure S28.**  $^1\text{H}$ -NMR spectrum of  $[\text{Zn}(\text{L}^{\text{CF}_3})_2]$  (**6**) in Acetone- $\text{d}_6$ .

**Figure S29.**  $^{13}\text{C}\{^1\text{H}\}$ -NMR spectrum of  $[\text{Zn}(\text{L}^{\text{CF}_3})_2]$  (**6**) in Acetone- $\text{d}_6$ .

**Figure S30.**  $^{19}\text{F}\{^1\text{H}\}$ -NMR spectrum of  $[\text{Zn}(\text{L}^{\text{CF}_3})_2]$  (**6**) in Acetone- $\text{d}_6$ .

**Figure S31.** FT-IR spectrum of  $[\text{Mn}(\text{L}^{\text{Mes}})_2(\text{H}_2\text{O})_2]$  (**7**).

**Figure S32.** ESI-MS(+) spectrum of  $[\text{Mn}(\text{L}^{\text{Mes}})_2(\text{H}_2\text{O})_2]$  (**7**) in  $\text{CH}_3\text{OH}$ .

**Figure S33.** FT-IR spectrum of  $[\text{Fe}(\text{L}^{\text{Mes}})_2]$  (**8**).

**Figure S34.** ESI-MS(+) spectrum of  $[\text{Fe}(\text{L}^{\text{Mes}})_2]$  (**8**) in  $\text{CH}_3\text{CN}$ .

**Figure S35.** FT-IR spectrum of  $[\text{Co}(\text{L}^{\text{Mes}})_2(\text{H}_2\text{O})_2]$  (**9**).

**Figure S36.** ESI-MS(+) spectrum of  $[\text{Co}(\text{L}^{\text{Mes}})_2(\text{H}_2\text{O})_2]$  (**9**) in  $\text{CH}_3\text{OH}/\text{CH}_3\text{CN}$ .

**Figure S37.** FT-IR spectrum of  $[\text{Ni}(\text{L}^{\text{Mes}})_2(\text{H}_2\text{O})_2]$  (**10**).

**Figure S38.** ESI-MS(+) spectrum of  $[\text{Ni}(\text{L}^{\text{Mes}})_2(\text{H}_2\text{O})_2]$  (**10**) in  $\text{CH}_3\text{CN}$ .

**Figure S39.** FT-IR spectrum of  $[\text{Cu}(\text{L}^{\text{Mes}})_2]$  (**11**).

**Figure S40.** ESI-MS(+) spectrum of  $[\text{Cu}(\text{L}^{\text{Mes}})_2]$  (**11**) in  $\text{CH}_3\text{OH}$ .

**Figure S41.** FT-IR spectrum of  $[\text{Zn}(\text{L}^{\text{Mes}})_2]$  (**12**).

**Figure S42.**  $^1\text{H}$ -NMR spectrum of  $[\text{Zn}(\text{L}^{\text{Mes}})_2]$  (**12**) in  $\text{CDCl}_3$ .

**Figure S43.**  $^{13}\text{C}\{^1\text{H}\}$ -NMR spectrum of  $[\text{Zn}(\text{L}^{\text{Mes}})_2]$  (**12**) in  $\text{CDCl}_3$ .

**Figure S44.** FT-IR spectrum of  $[\text{Mn}(\text{L}^{\text{Ph}})_2(\text{H}_2\text{O})_2]$  (**13**).

**Figure S45.** ESI-MS(+) spectrum of  $[\text{Mn}(\text{L}^{\text{Ph}})_2(\text{H}_2\text{O})_2]$  (**13**) in  $\text{CH}_3\text{OH}$ .

**Figure S46.** FT-IR spectrum of  $[\text{Fe}(\text{L}^{\text{Ph}})_2]$  (**14**).

**Figure S47.** ESI-MS(+) spectrum of  $[\text{Fe}(\text{L}^{\text{Ph}})_2]$  (**14**) in  $\text{CH}_3\text{OH}/\text{CH}_3\text{CN}$ .

**Figure S48.** FT-IR spectrum of  $[\text{Co}(\text{L}^{\text{Ph}})_2(\text{H}_2\text{O})_2]$  (**15**).

**Figure S49.** ESI-MS(+) spectrum of  $[\text{Co}(\text{L}^{\text{Ph}})_2(\text{H}_2\text{O})_2]$  (**15**) in  $\text{CH}_3\text{CN}$ .

**Figure S50.** FT-IR spectrum of  $[\text{Ni}(\text{L}^{\text{Ph}})_2(\text{H}_2\text{O})_2]$  (**16**).

**Figure S51.** ESI-MS(+) spectrum of  $[\text{Ni}(\text{L}^{\text{Ph}})_2(\text{H}_2\text{O})_2]$  (**16**) in  $\text{CH}_3\text{CN}$ .

**Figure S52.** FT-IR spectrum of  $[\text{Cu}(\text{L}^{\text{Ph}})_2]$  (**17**).

**Figure S53.** ESI-MS(+) spectrum of  $[\text{Cu}(\text{L}^{\text{Ph}})_2]$  (**17**) in  $\text{CH}_3\text{OH}$ .

**Figure S54.** FT-IR spectrum of  $[\text{Zn}(\text{L}^{\text{Ph}})_2] \cdot 2\text{H}_2\text{O}$  (**18**).

**Figure S55.**  $^1\text{H}$ -NMR spectrum of  $[\text{Zn}(\text{L}^{\text{Ph}})_2] \cdot 2\text{H}_2\text{O}$  (**18**) in  $\text{CDCl}_3$ .

**Figure S56.**  $^{13}\text{C}\{^1\text{H}\}$ -NMR spectrum of  $[\text{Zn}(\text{L}^{\text{Ph}})_2] \cdot 2\text{H}_2\text{O}$  (**18**) in  $\text{CDCl}_3$ .

**Figure S57.** Stability studies. All complexes were dissolved at 50  $\mu\text{M}$  in 0.5% DMSO/ physiological solution. UV-Visible spectra were recorded at  $t = 0$  h and  $t = 72$  h.

**Table S1.** Crystal data and structure refinement for  $[\text{Cu}(\text{L}^{\text{Mes}})_2]$  (**11**).

**Table S2.** Bond Lengths for  $[\text{Cu}(\text{L}^{\text{Mes}})_2]$  (**11**).

**Table S3.** Bond Angles for  $[\text{Cu}(\text{L}^{\text{Mes}})_2]$  (**11**).

**Table S4.** Crystal data and structure refinement for  $[\text{Zn}(\text{L}^{\text{Mes}})_2]$  (**12**).

**Table S5.** Bond Lengths for  $[\text{Zn}(\text{L}^{\text{Mes}})_2]$  (**12**).

**Table S6.** Bond Angles for  $[\text{Zn}(\text{L}^{\text{Mes}})_2]$  (**12**).

**Table S7.** Crystal data and structure refinement for  $[\text{Cu}(\text{L}^{\text{CF}_3})_2(\text{THF})] \cdot 2(\text{THF})$ .

**Table S8.** Bond Lengths for  $[\text{Cu}(\text{L}^{\text{CF}_3})_2(\text{THF})] \cdot 2(\text{THF})$ .

**Table S9.** Bond Angles for  $[\text{Cu}(\text{L}^{\text{CF}_3})_2(\text{THF})] \cdot 2(\text{THF})$ .

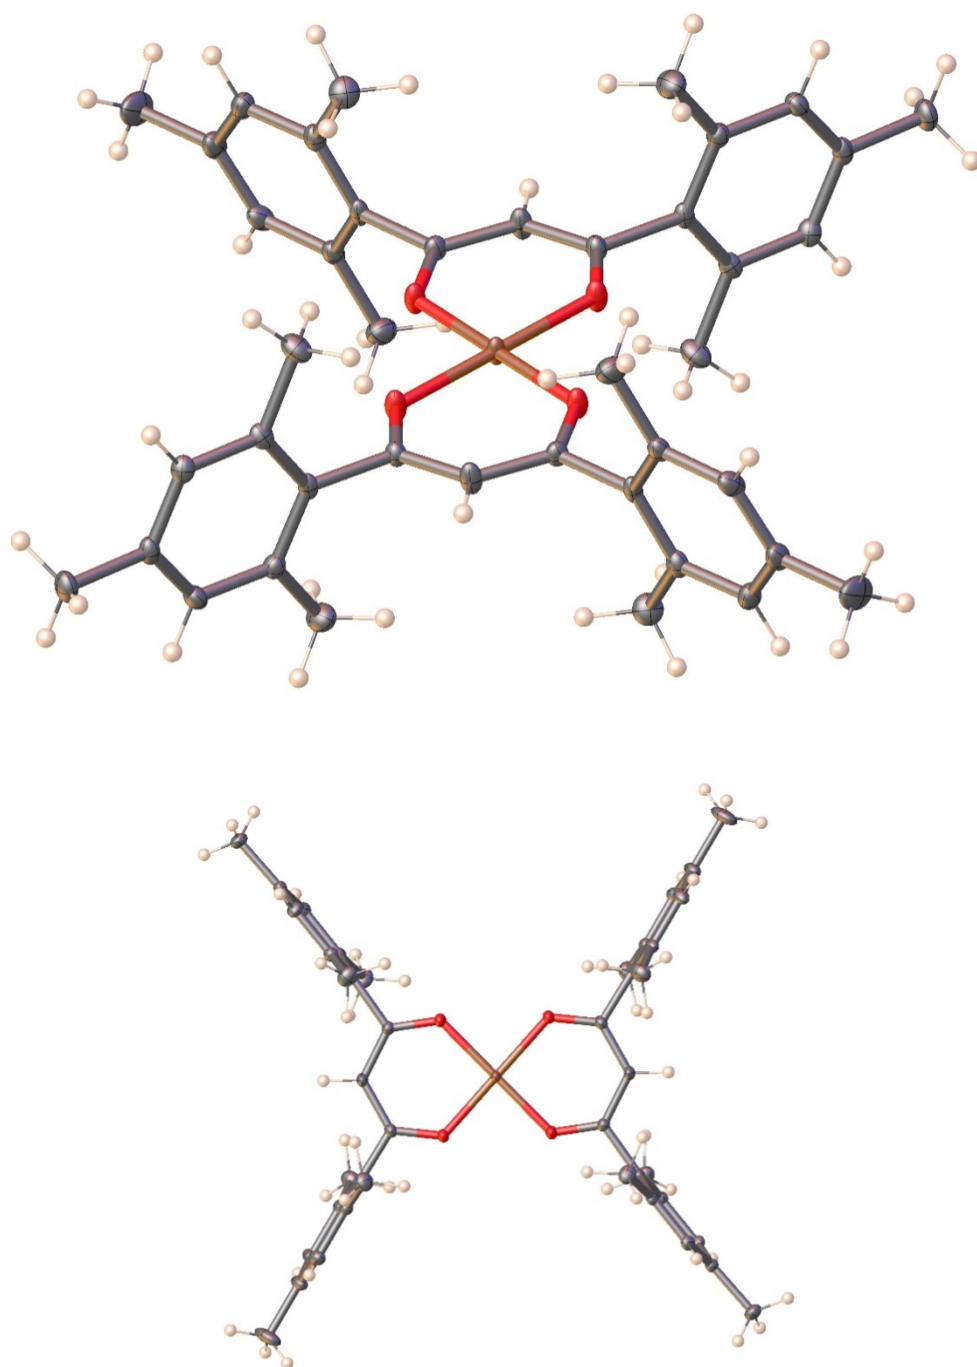

**Figure S1.** Two views of [Cu(L<sup>Mes</sup>)<sub>2</sub>] (**11**).

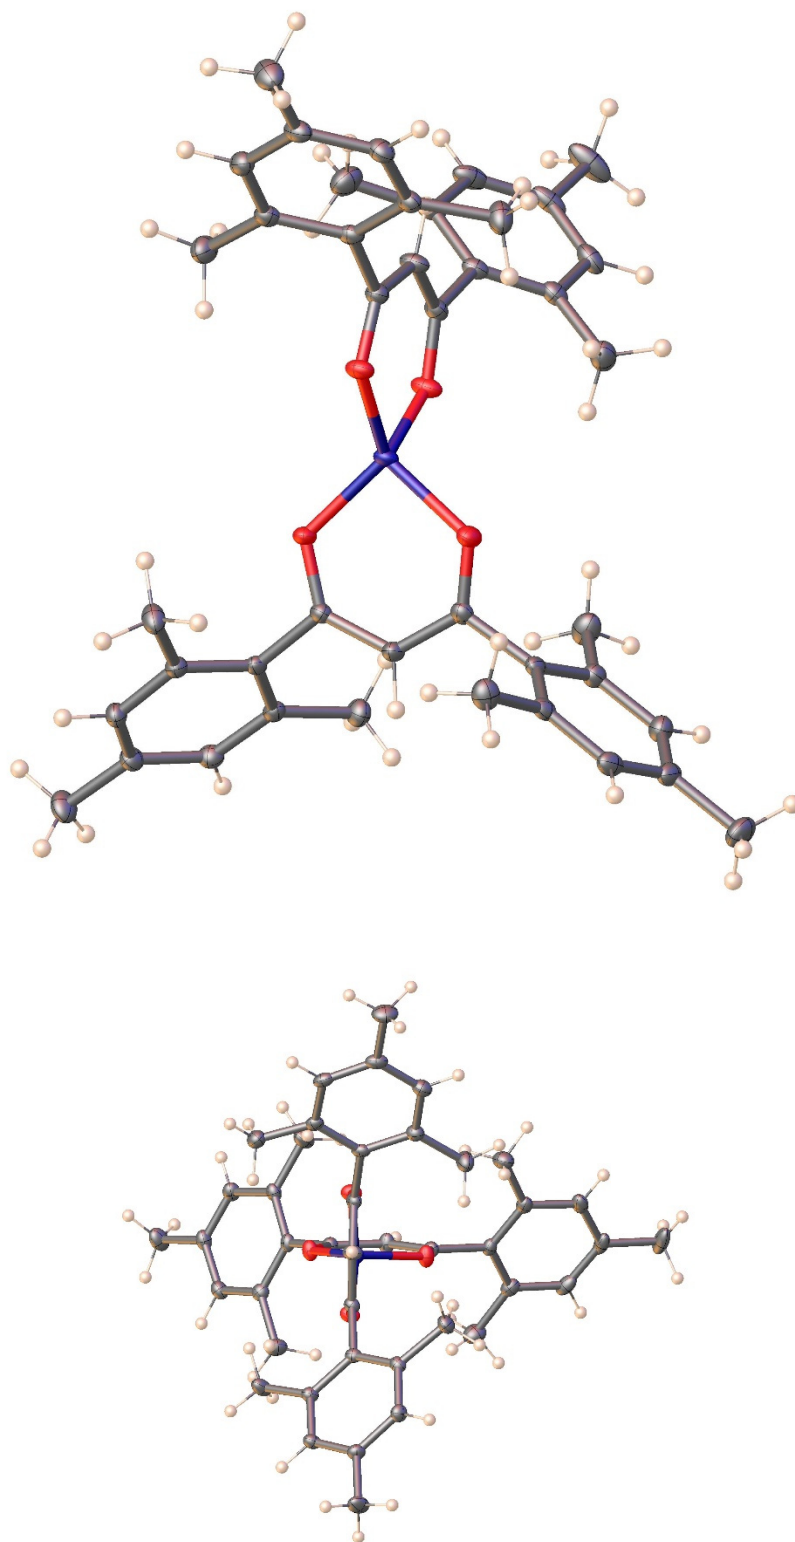

**Figure S2.** Two views of [Zn(L<sup>Mes</sup>)<sub>2</sub>] (**12**).

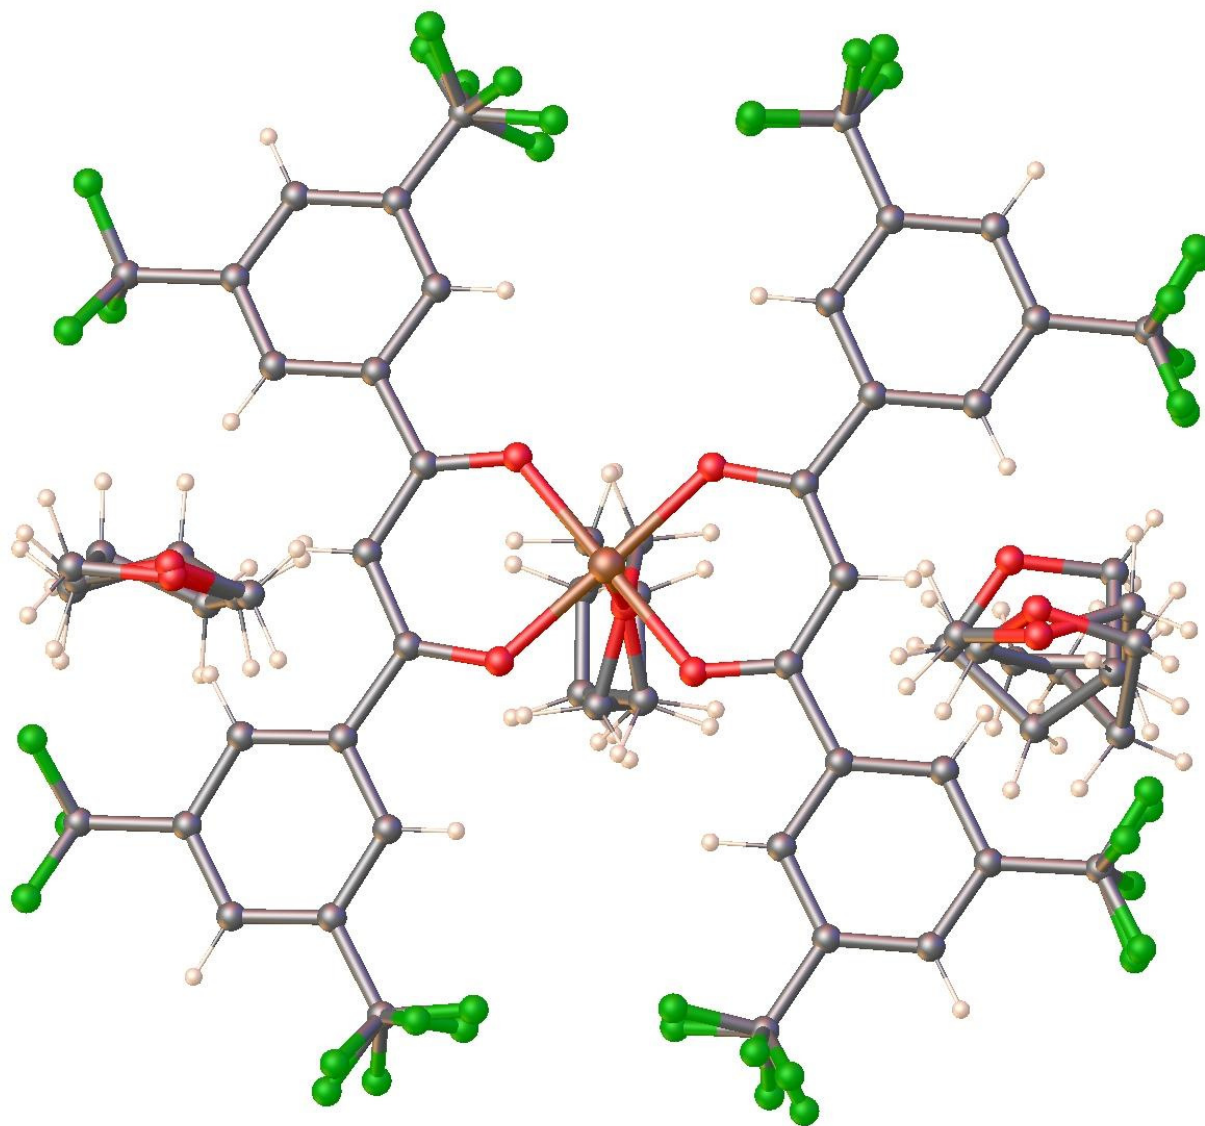

**Figure S3.** A view of [Cu(L<sup>CF3</sup>)<sub>2</sub>(THF)]·2(THF) showing THF and CF<sub>3</sub> moiety disorder.

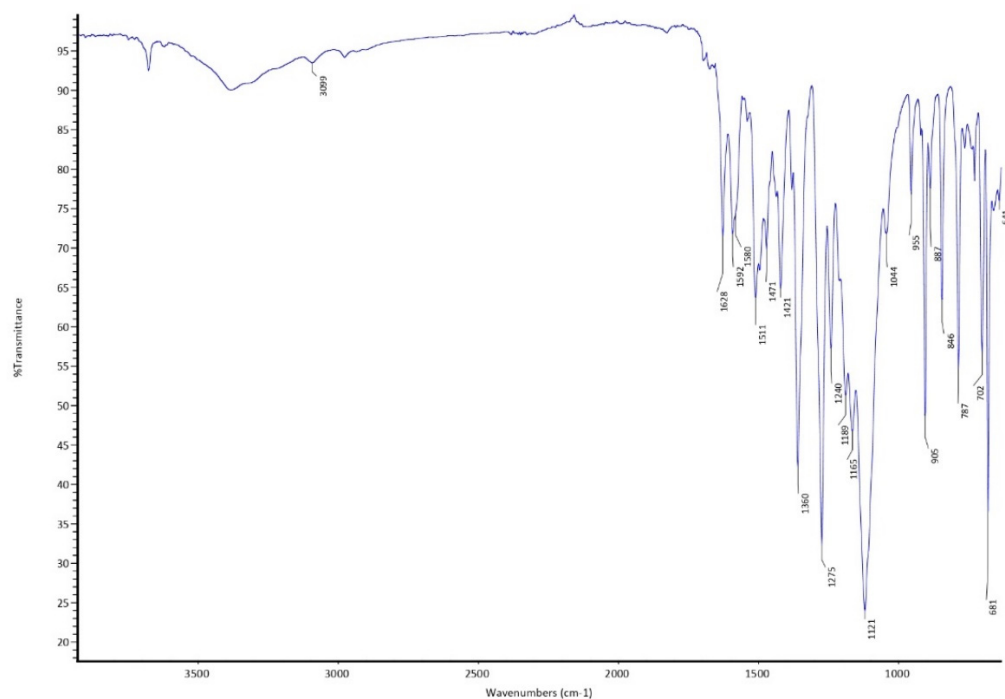

**Figure S4.** FT-IR spectrum of NaL<sup>CF3</sup>.

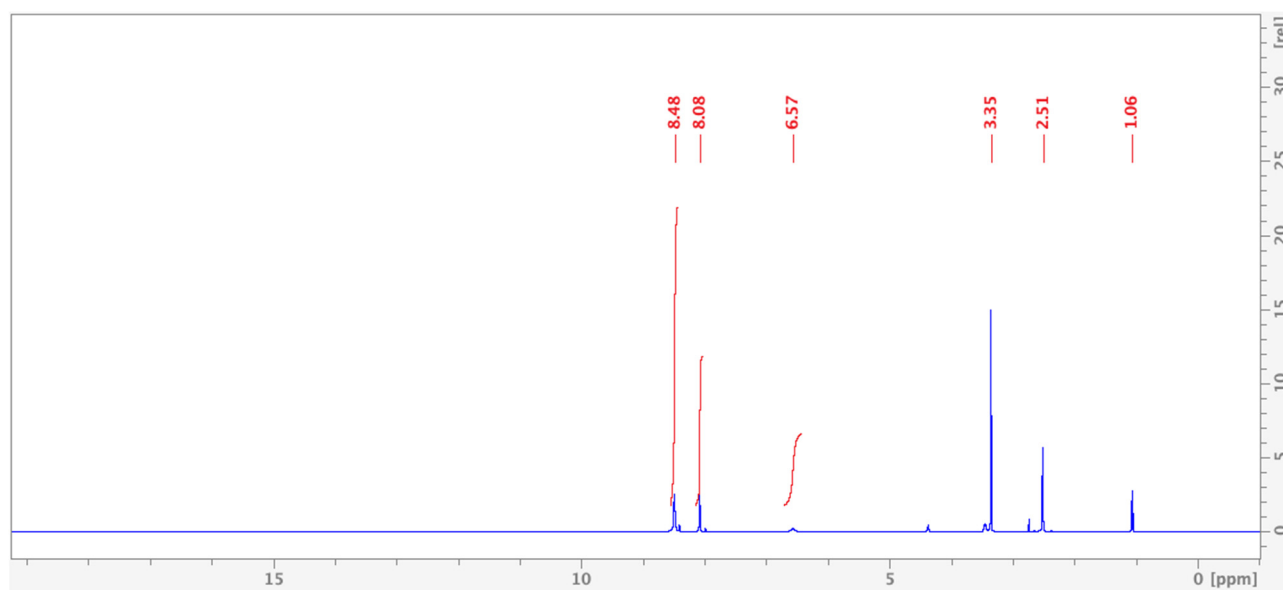

**Figure S5.** <sup>1</sup>H-NMR spectrum of NaL<sup>CF3</sup> in DMSO-d<sub>6</sub>.

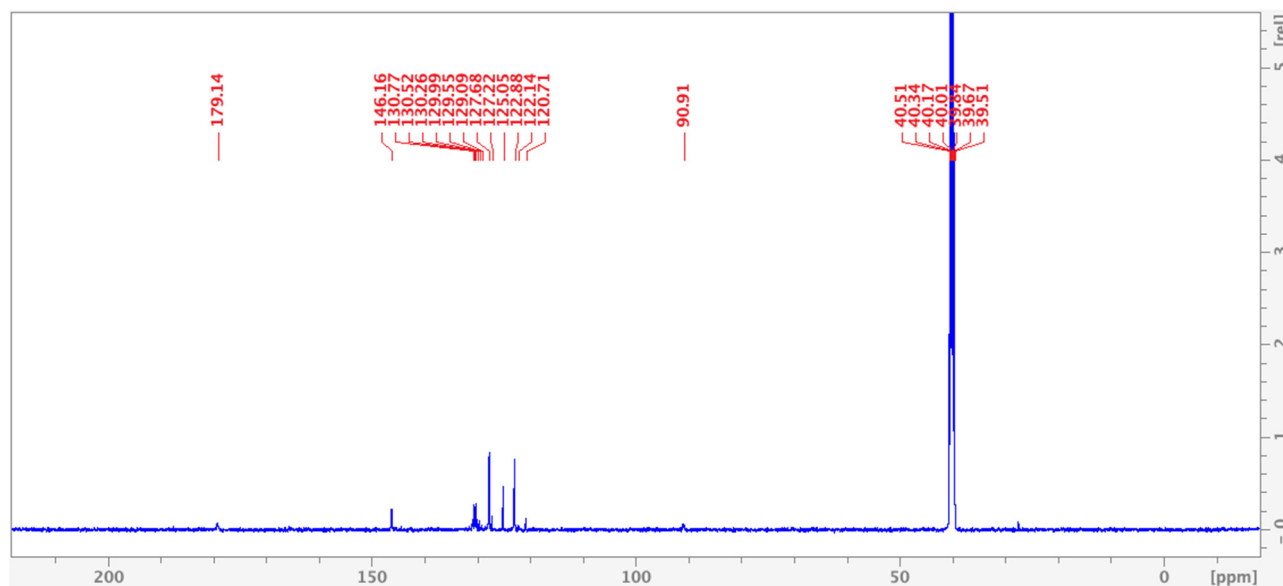

**Figure S6.**  $^{13}\text{C}\{^1\text{H}\}$ -NMR spectrum of  $\text{NaL}^{\text{CF}_3}$  in  $\text{DMSO-d}_6$ .

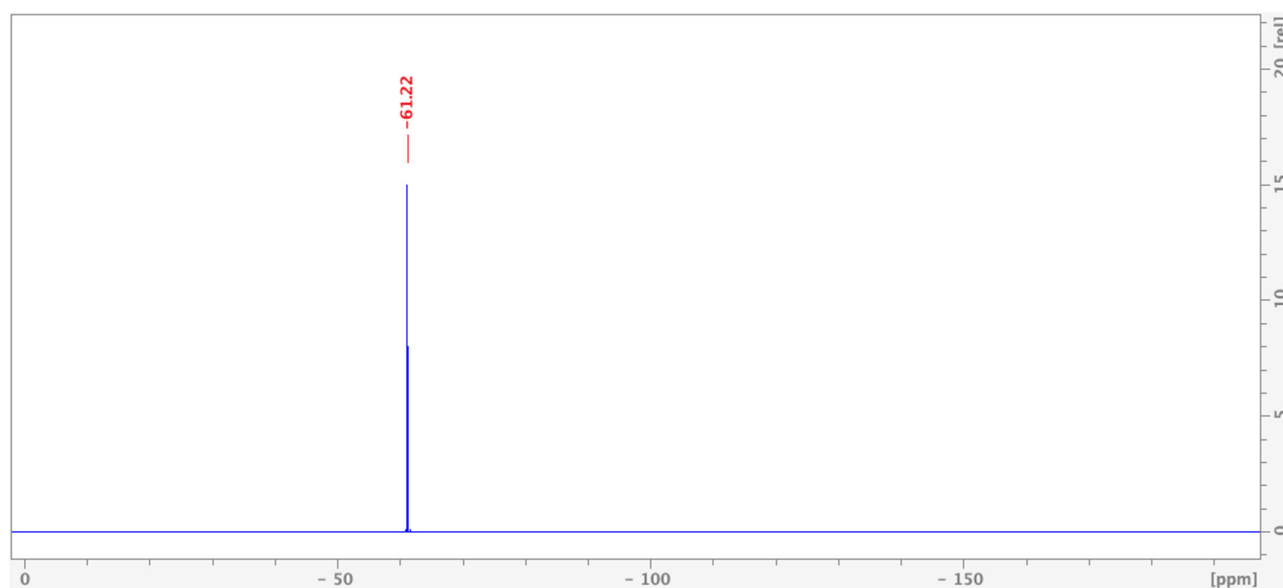

**Figure S7.**  $^{19}\text{F}\{^1\text{H}\}$ -NMR spectrum of  $\text{NaL}^{\text{CF}_3}$  in  $\text{DMSO-d}_6$ .



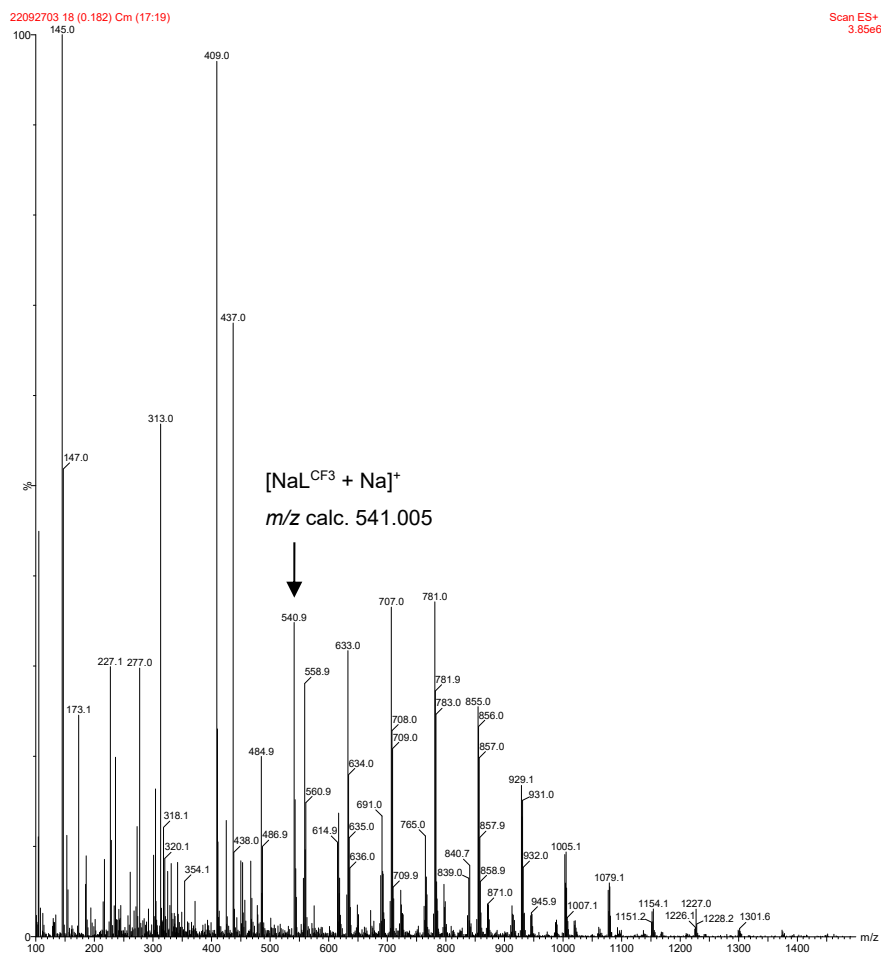

**Figure S8.** ESI-MS(+) spectrum of  $\text{NaL}^{\text{CF}_3}$  in  $\text{CH}_3\text{CN}$ .

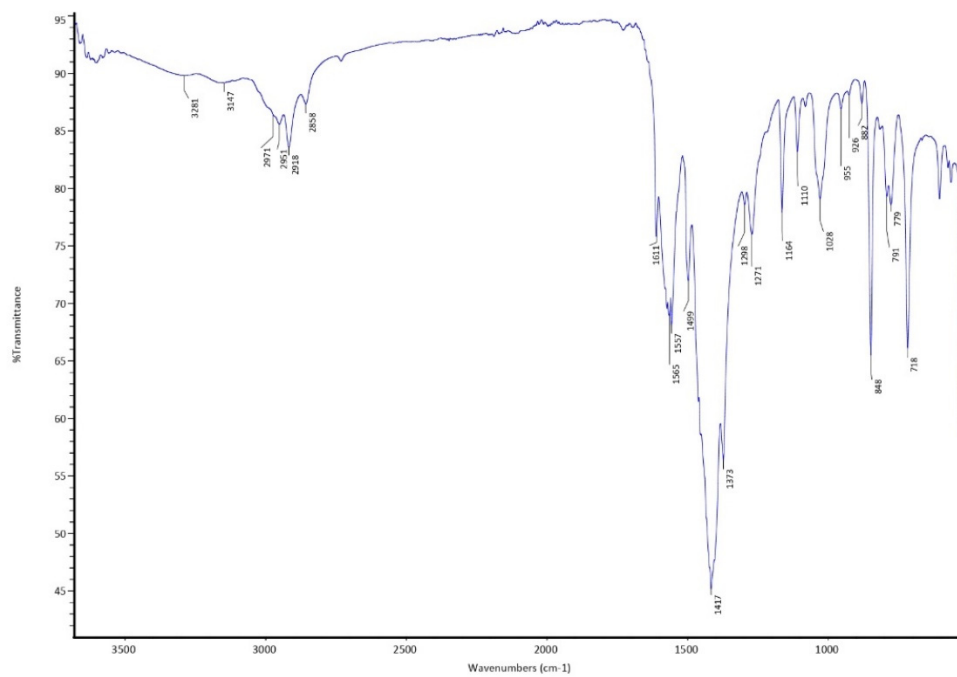

**Figure S9.** FT-IR spectrum of  $\text{NaL}^{\text{Mes}}$ .

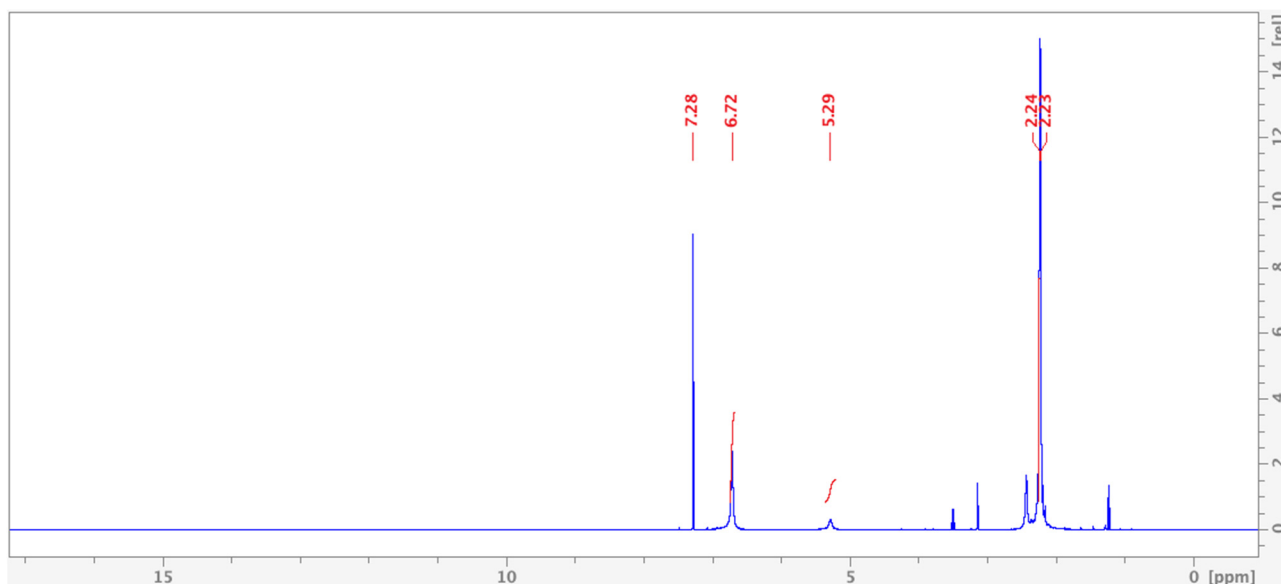

**Figure S10.**  $^1\text{H}$ -NMR spectrum of  $\text{NaL}^{\text{Mes}}$  in  $\text{CDCl}_3$ .

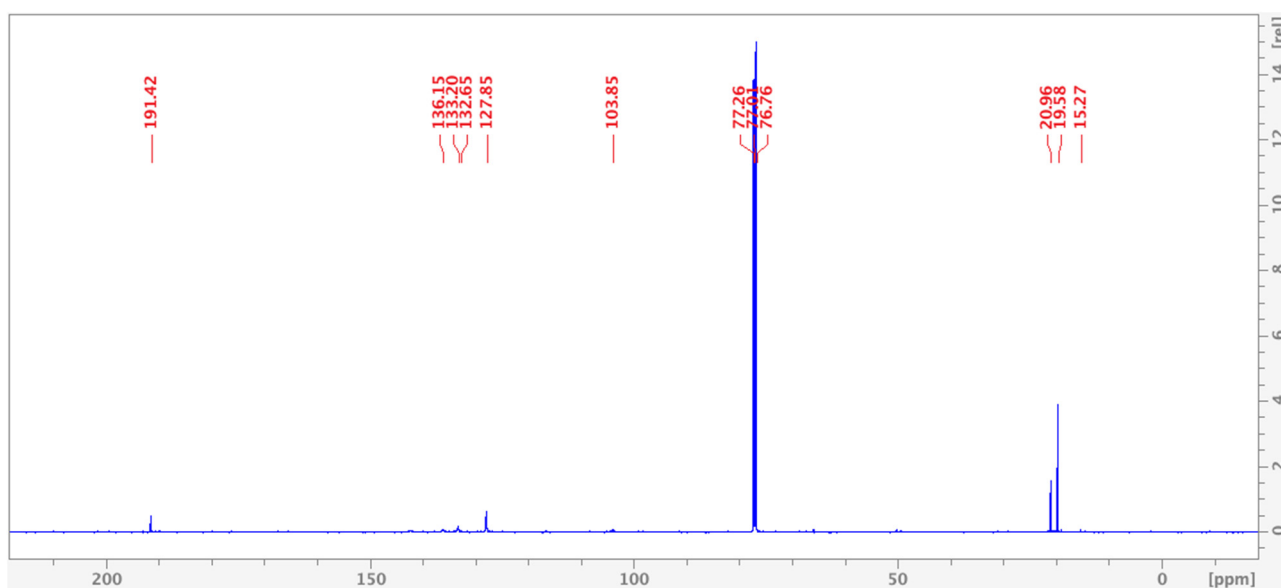

**Figure S11.**  $^{13}\text{C}\{^1\text{H}\}$ -NMR of  $\text{NaL}^{\text{Mes}}$  in  $\text{CDCl}_3$ .

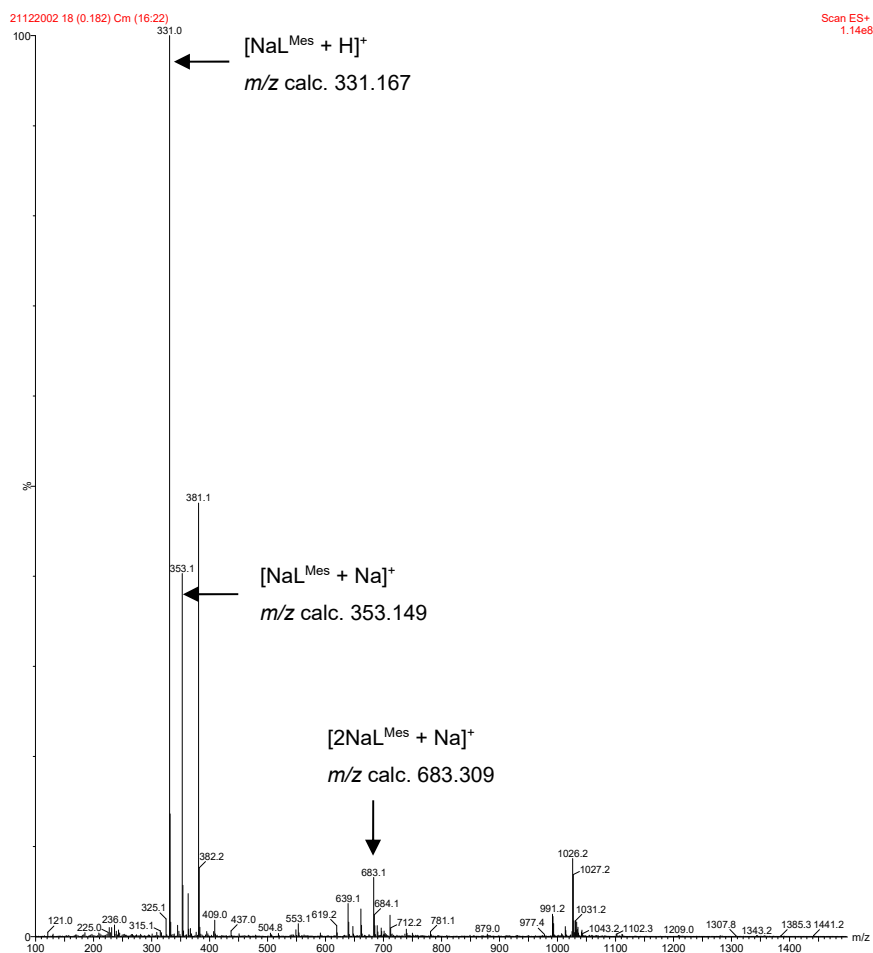

**Figure S12.** ESI-MS(+) spectrum of  $\text{NaL}^{\text{Mes}}$  in  $\text{CH}_3\text{OH}$ .

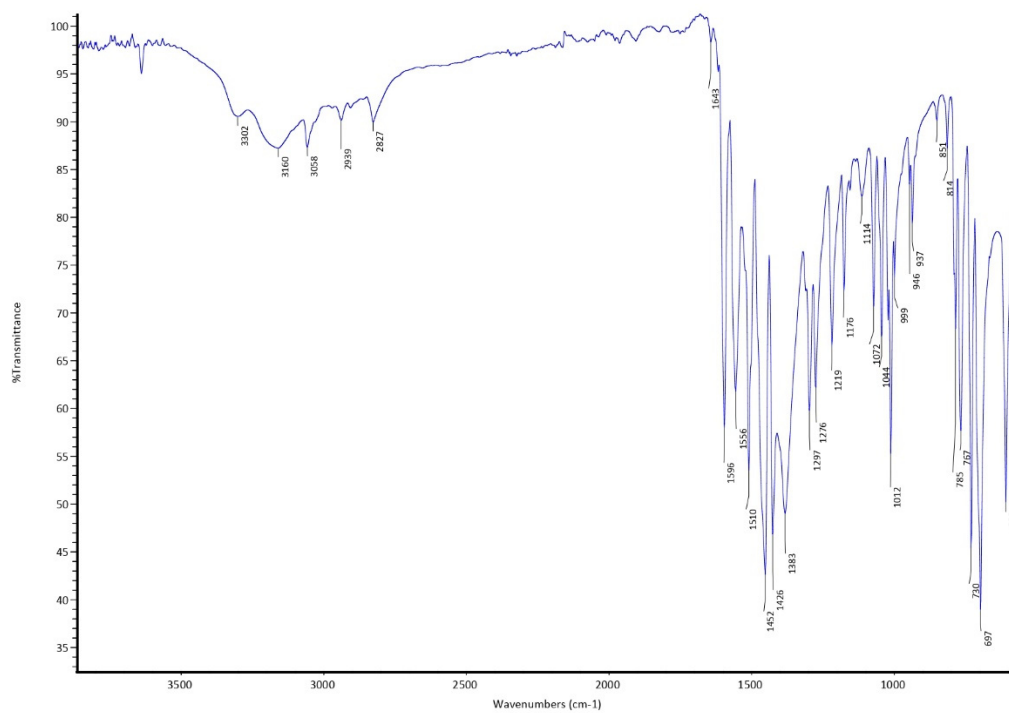

**Figure S13.** FT-IR spectrum of  $\text{NaL}^{\text{Ph}}$ .

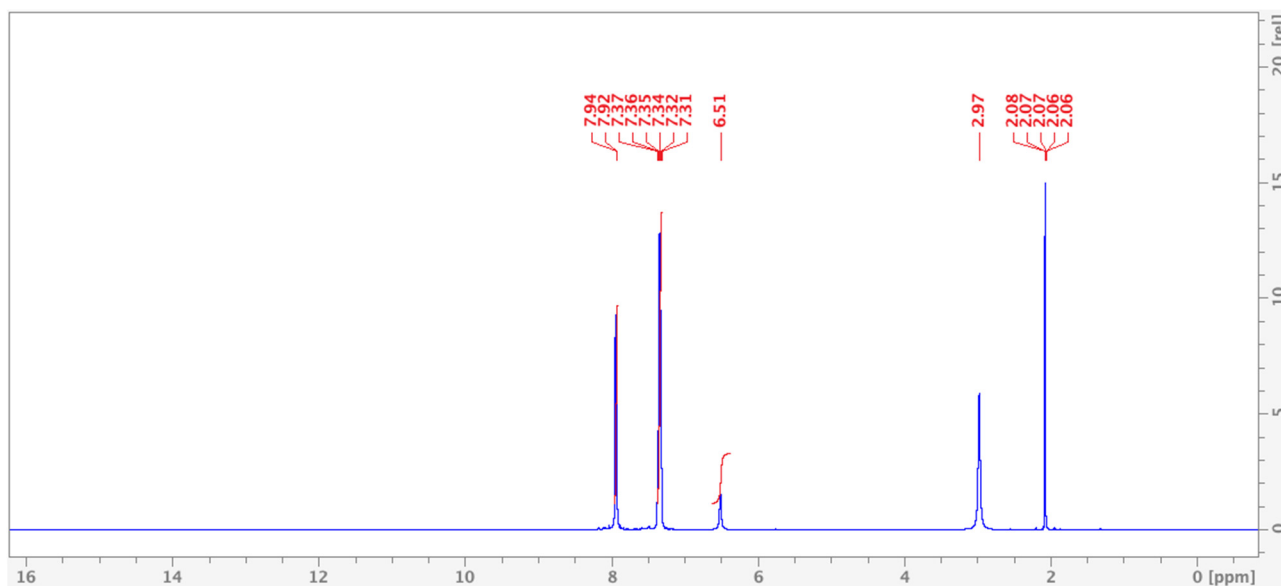

**Figure S14.**  $^1\text{H}$ -NMR of  $\text{NaL}^{\text{Ph}}$  in  $\text{Acetone-d}_6$ .

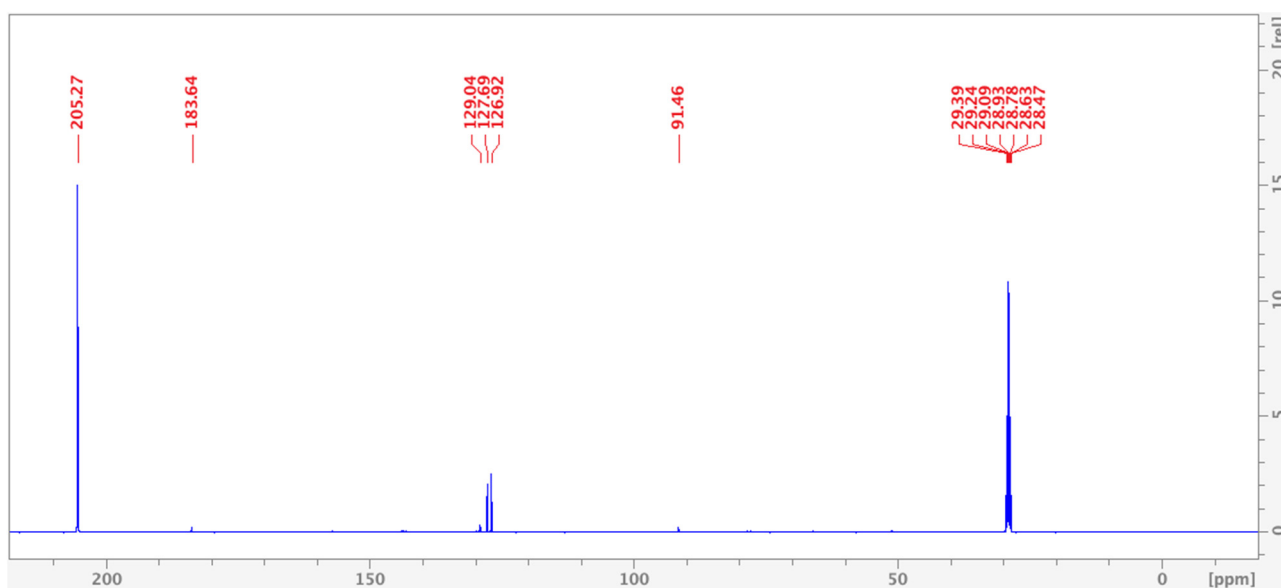

**Figure S15.**  $^{13}\text{C}\{^1\text{H}\}$ -NMR of  $\text{NaL}^{\text{Ph}}$  in  $\text{Acetone-d}_6$ .

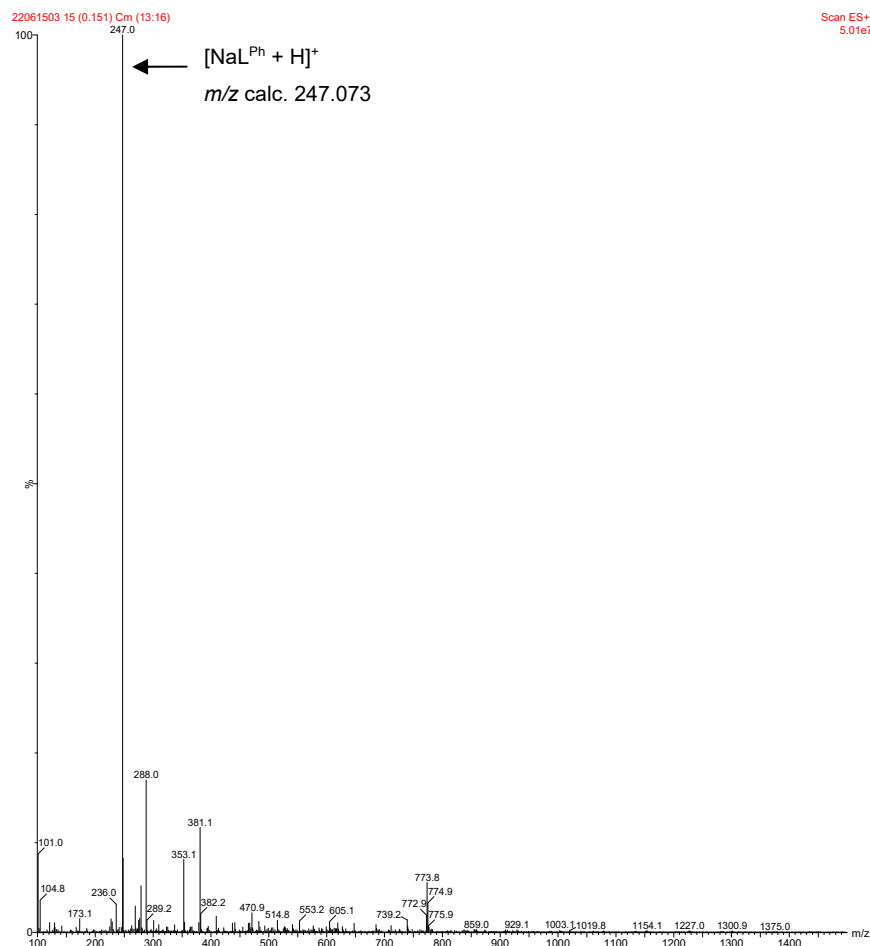

**Figure S16.** ESI-MS(+) spectrum of NaL<sup>Ph</sup> in CH<sub>3</sub>OH.

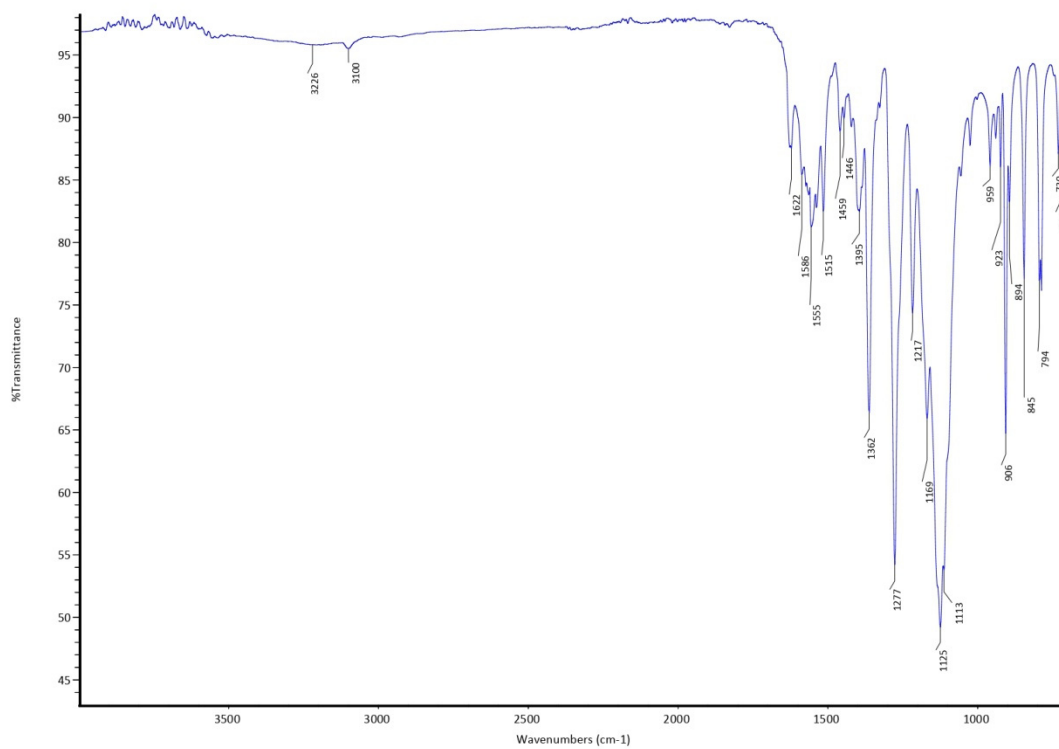

**Figure S17.** FT-IR spectrum of [Mn(L<sup>CF3</sup>)<sub>2</sub>(H<sub>2</sub>O)<sub>2</sub>] (**1**).

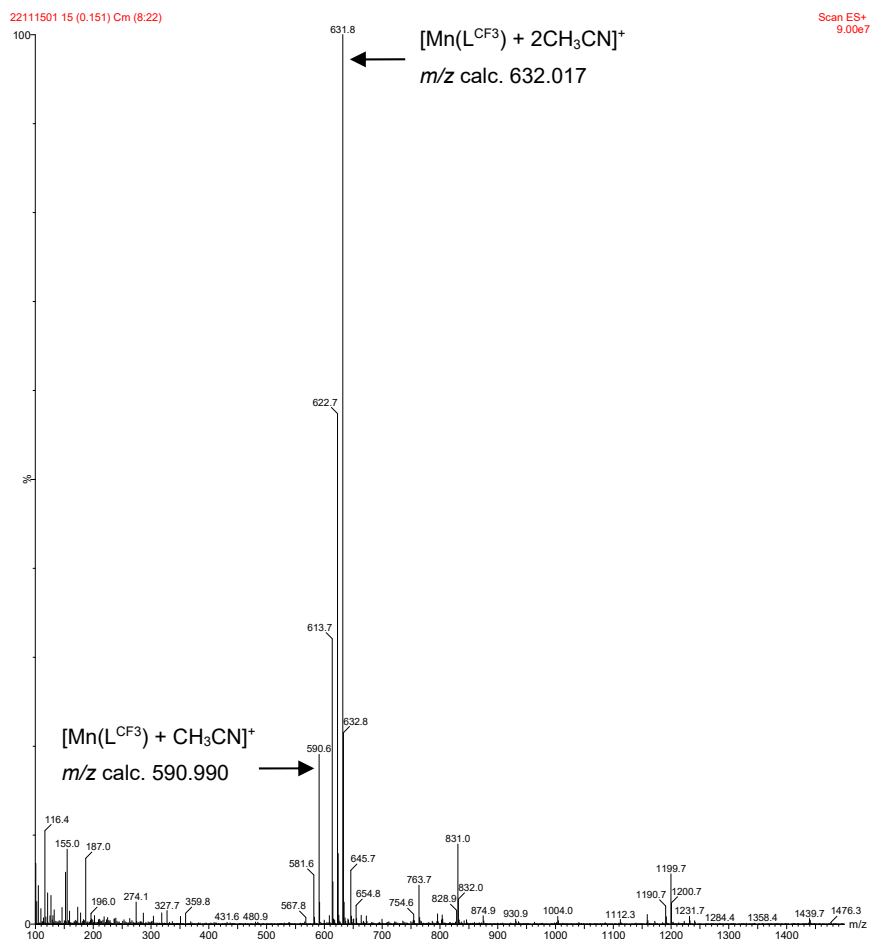

**Figure S18.** ESI-MS(+) spectrum of  $[\text{Mn}(\text{L}^{\text{CF}_3})_2(\text{H}_2\text{O})_2]$  (**1**) in  $\text{CH}_3\text{OH}/\text{CH}_3\text{CN}$ .

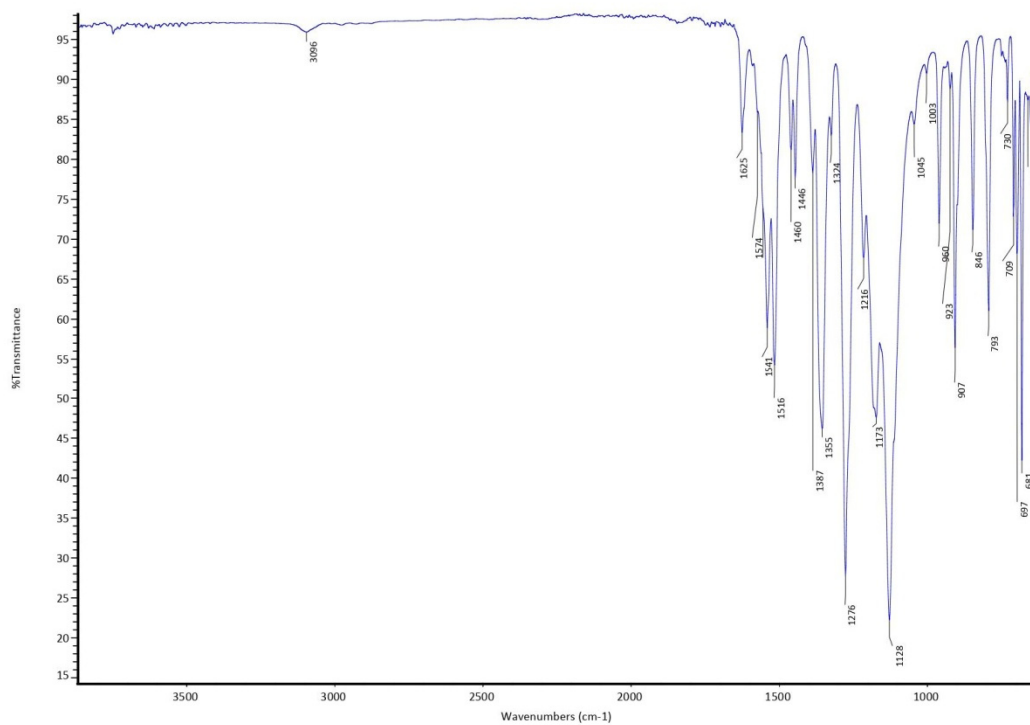

**Figure S19.** FT-IR spectrum of  $[\text{Fe}(\text{L}^{\text{CF}_3})_2]$  (**2**).

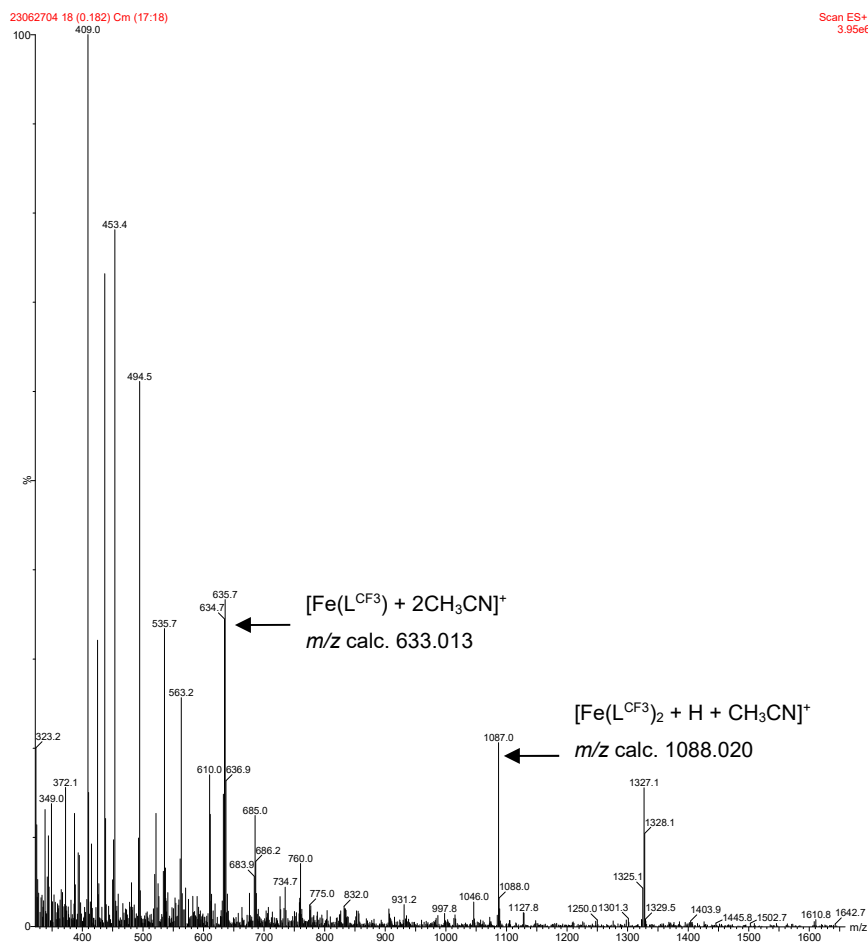

**Figure S20.** ESI-MS(+) spectrum of  $[\text{Fe}(\text{L}^{\text{CF}_3})_2]$  (**2**) in  $\text{CH}_3\text{CN}$ .

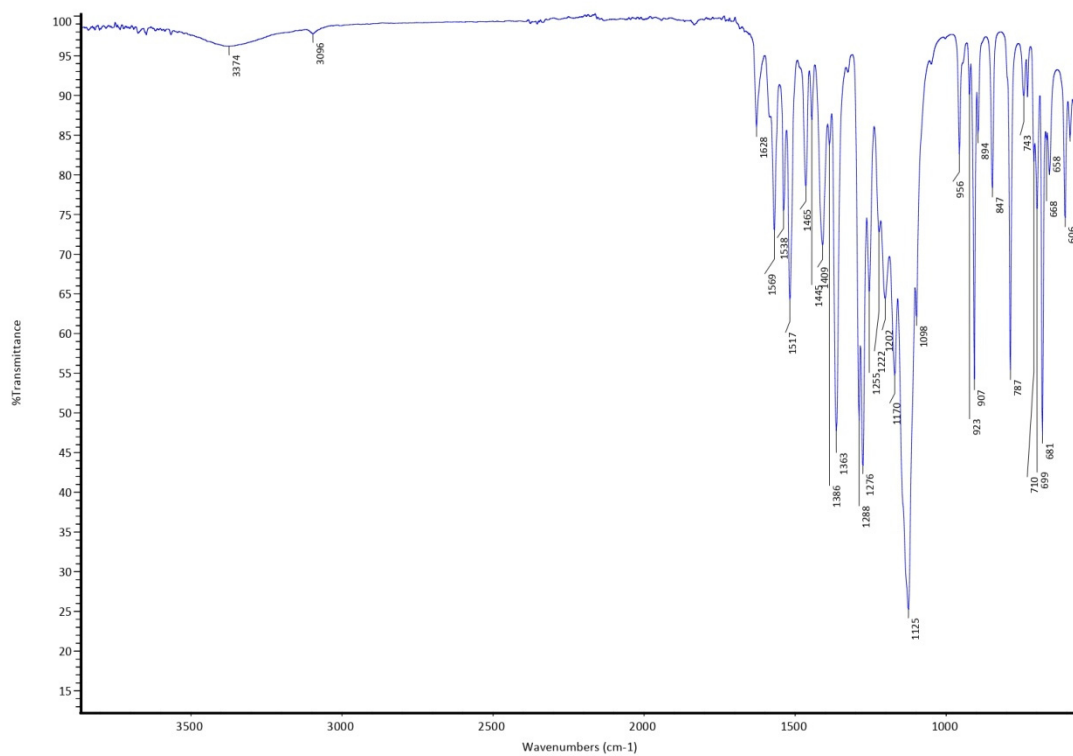

**Figure S21.** FT-IR spectrum of  $[\text{Co}(\text{L}^{\text{CF}_3})_2(\text{H}_2\text{O})_2]$  (**3**).

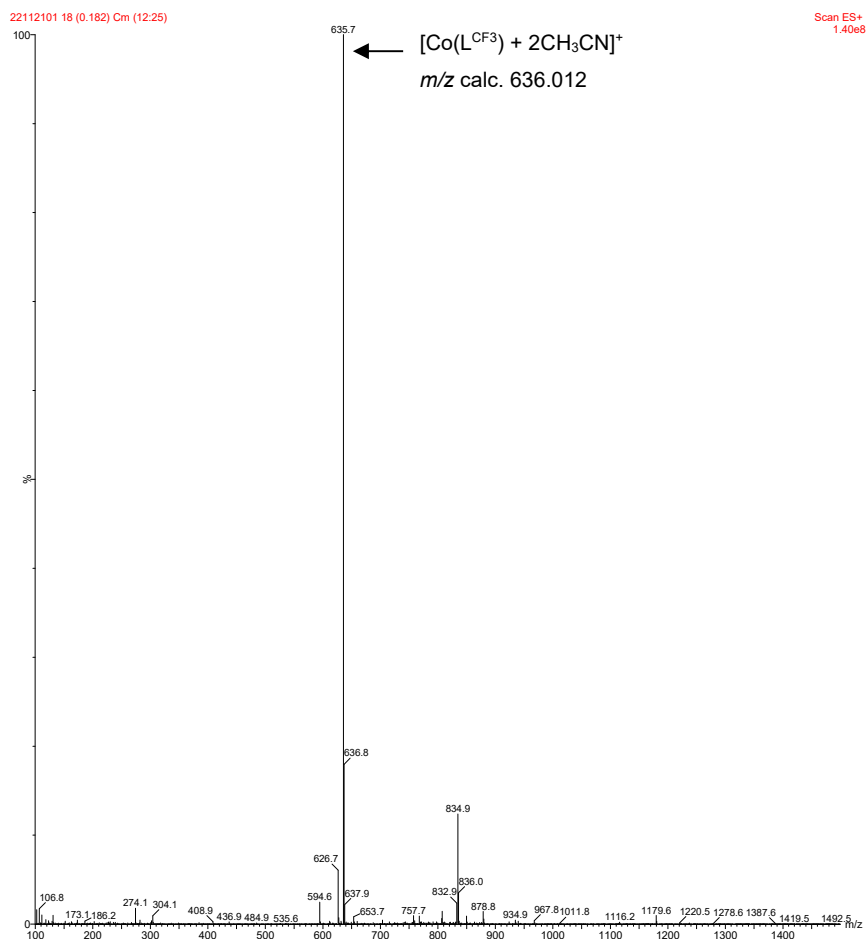

**Figure S22.** ESI-MS(+) spectrum of  $[\text{Co}(\text{L}^{\text{CF}_3})_2(\text{H}_2\text{O})_2]$  (**3**) in  $\text{CH}_3\text{OH}/\text{CH}_3\text{CN}$ .

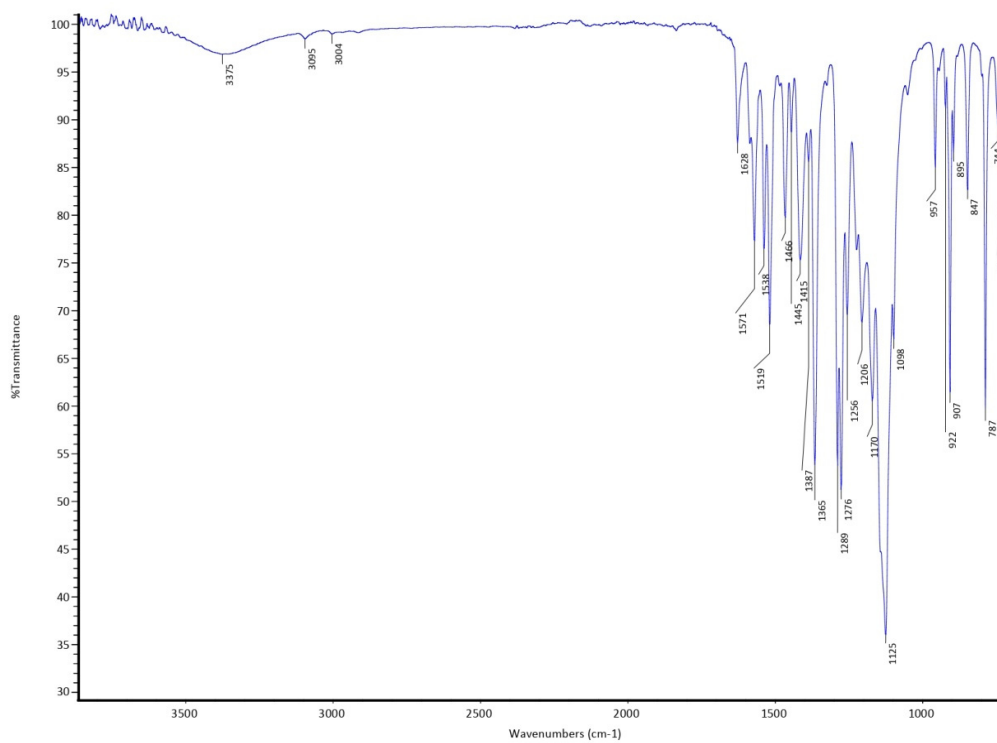

**Figure S23.** FT-IR spectrum of  $[\text{Ni}(\text{L}^{\text{CF}_3})_2(\text{H}_2\text{O})_2]$  (**4**).



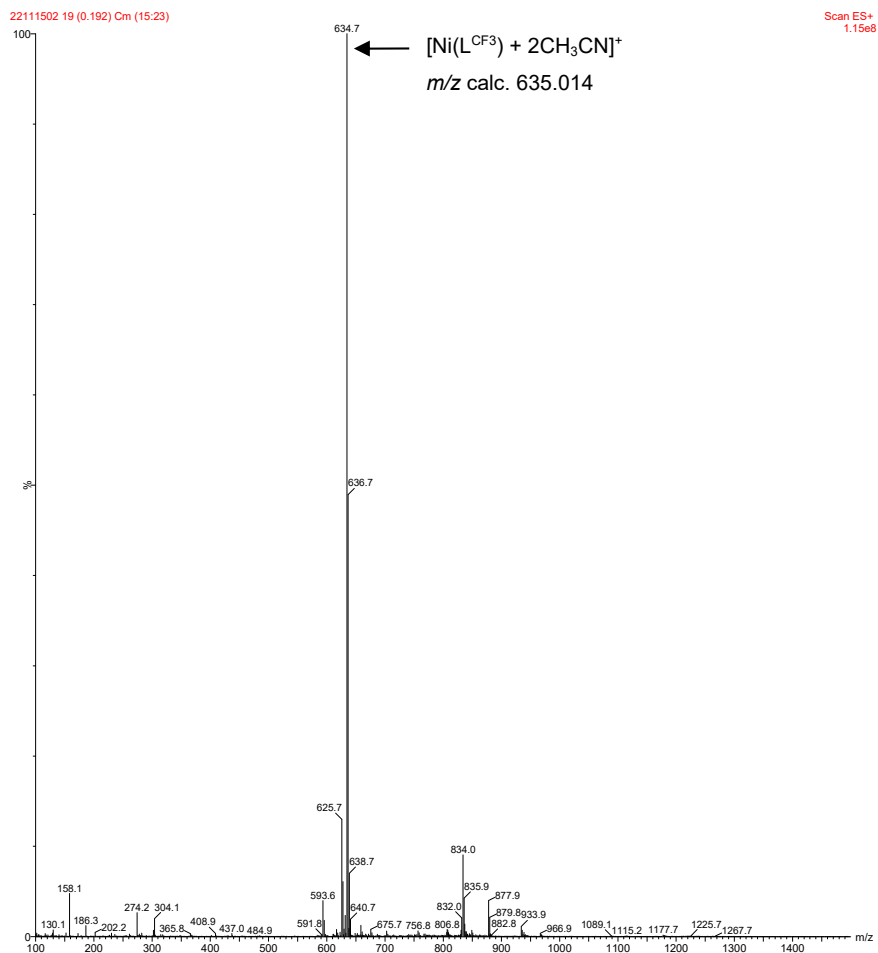

**Figure S24.** ESI-MS(+) spectrum of  $[\text{Ni}(\text{L}^{\text{CF}_3})_2(\text{H}_2\text{O})_2]$  (**4**) in  $\text{CH}_3\text{OH}/\text{CH}_3\text{CN}$ .

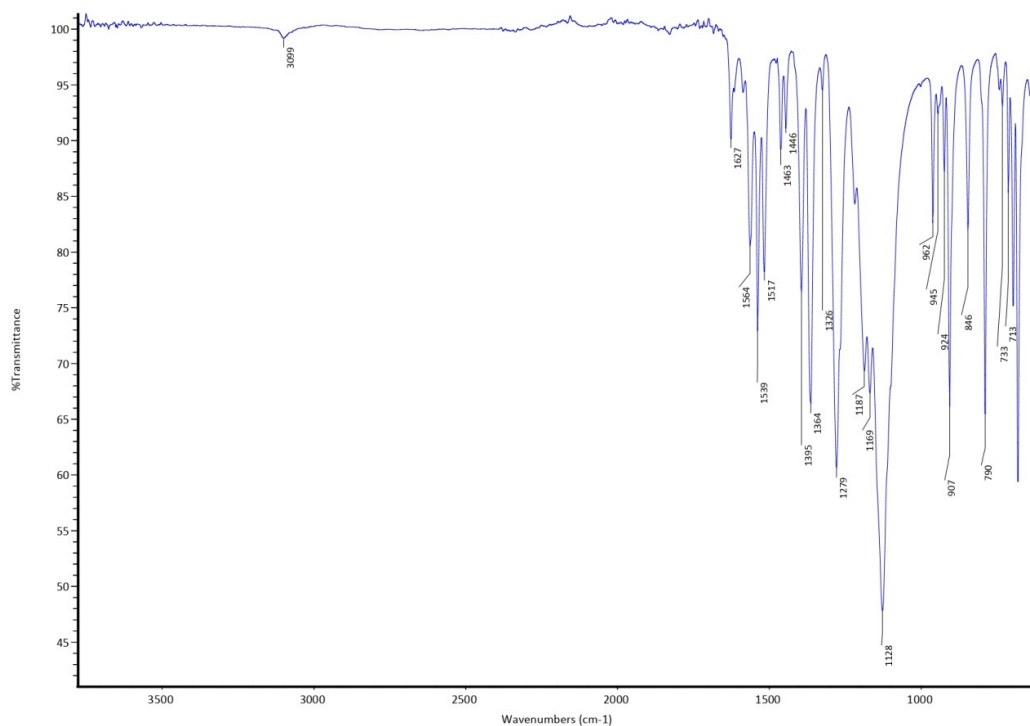

**Figure S25.** FT-IR spectrum of  $[\text{Cu}(\text{L}^{\text{CF}_3})_2]$  (**5**).

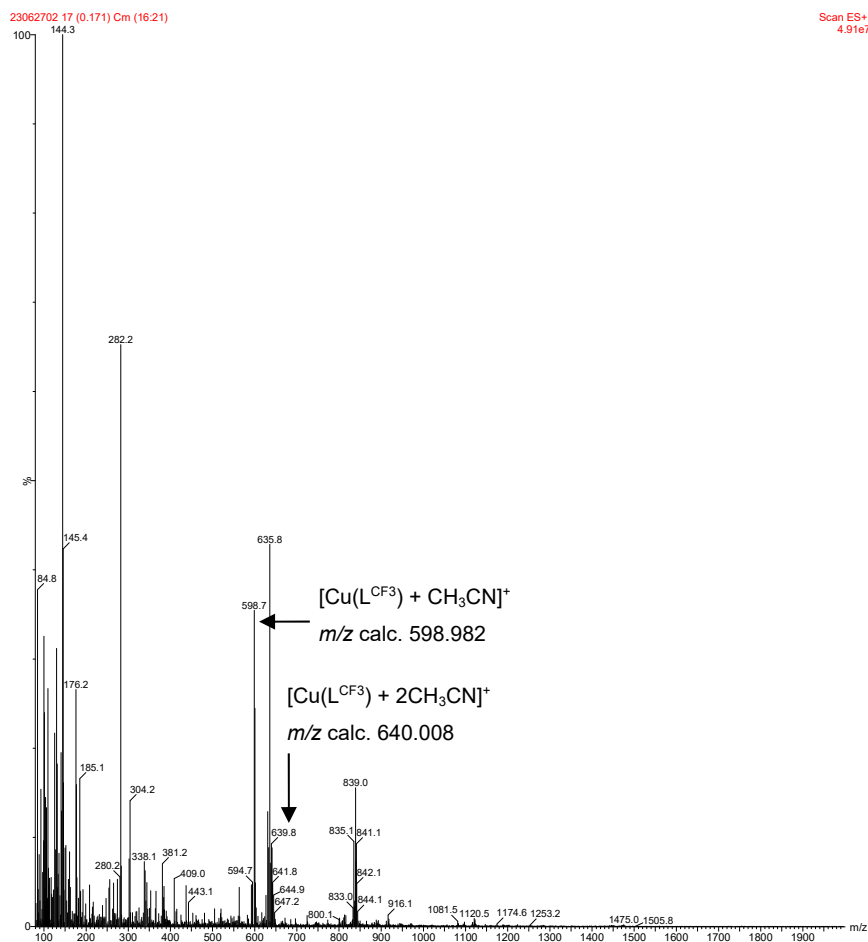

**Figure S26.** ESI-MS(+) spectrum of  $[\text{Cu}(\text{L}^{\text{CF}_3})_2]$  (**5**) in  $\text{CH}_3\text{OH}/\text{CH}_3\text{CN}$ .

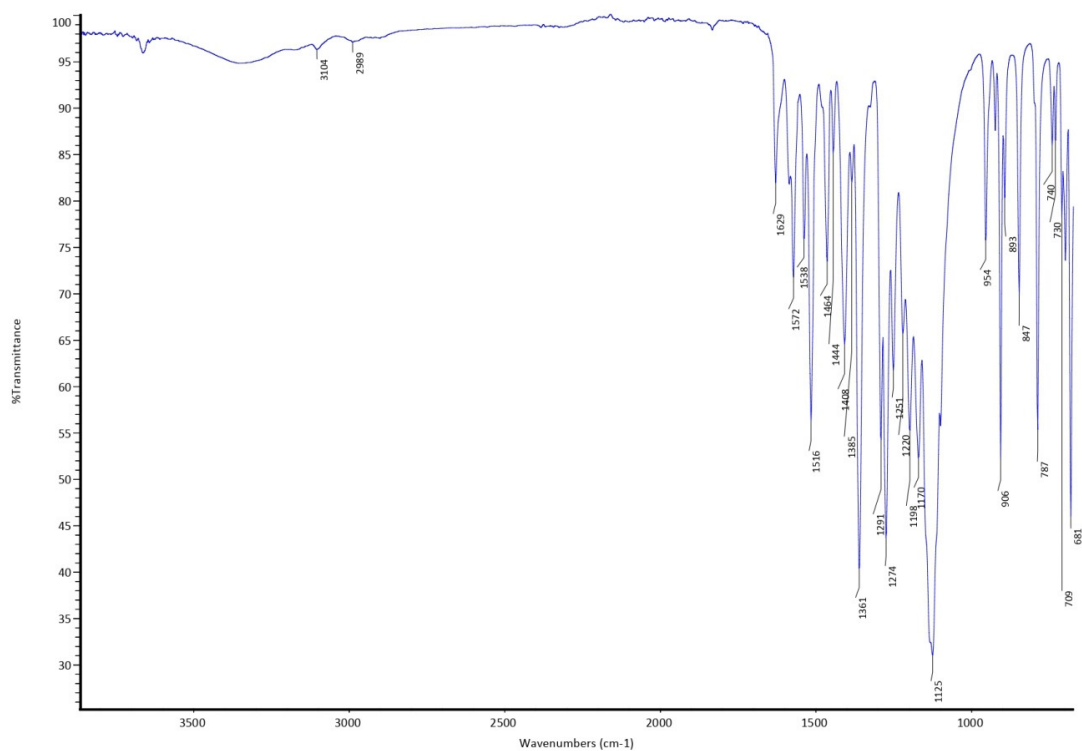

**Figure S27.** FT-IR spectrum of  $[\text{Zn}(\text{L}^{\text{CF}_3})_2]$  (**6**).

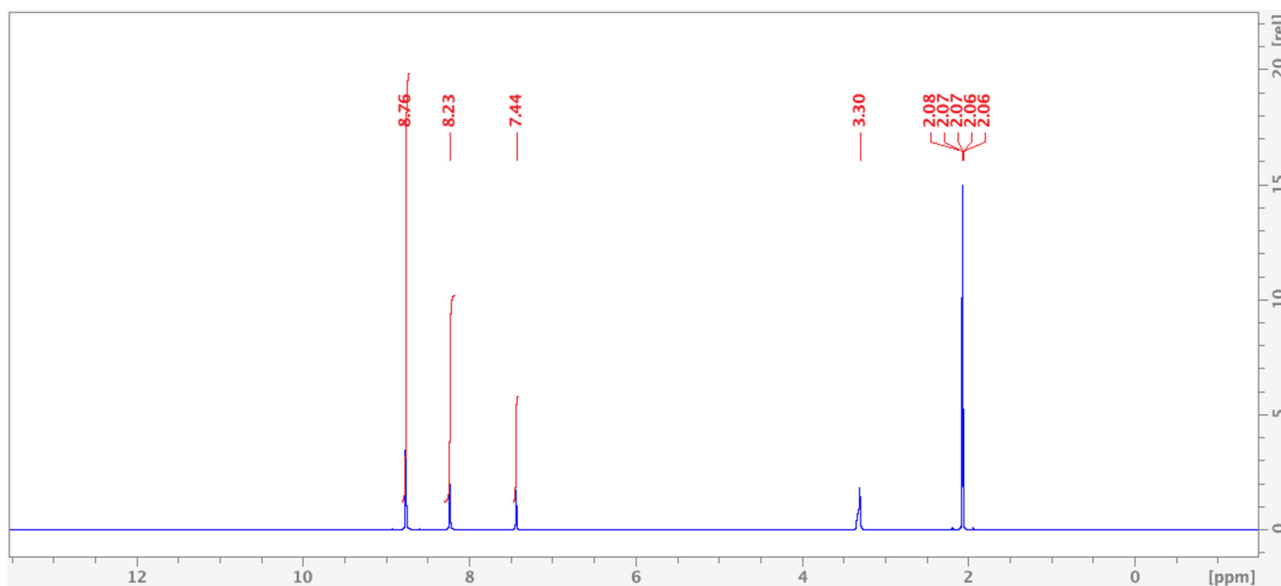

**Figure S28.** <sup>1</sup>H-NMR spectrum of [Zn(L<sup>CF3</sup>)<sub>2</sub>] (**6**) in Acetone-d<sub>6</sub>.

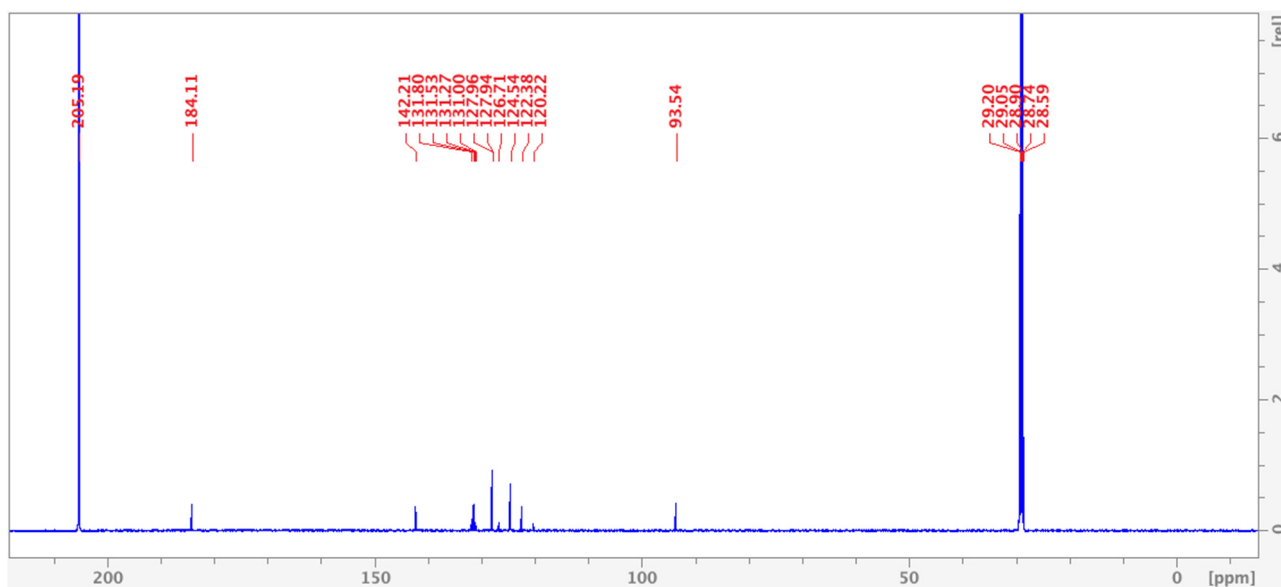

**Figure S29.** <sup>13</sup>C{<sup>1</sup>H}-NMR spectrum of [Zn(L<sup>CF3</sup>)<sub>2</sub>] (**6**) in Acetone-d<sub>6</sub>.

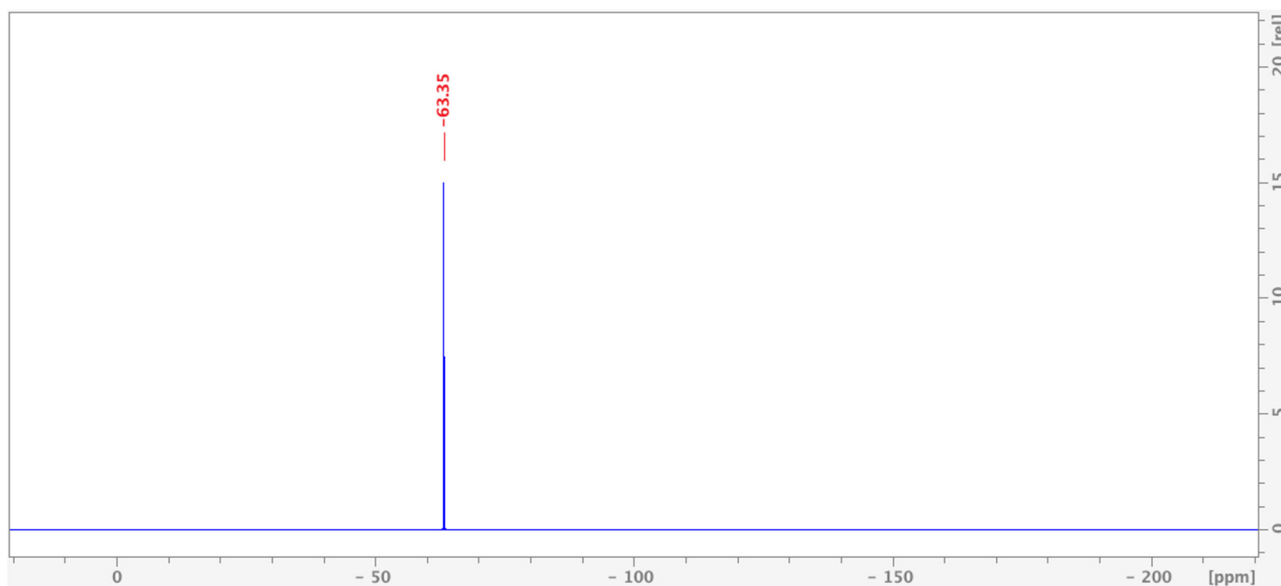

**Figure S30.**  $^{19}\text{F}\{^1\text{H}\}$ -NMR spectrum of  $[\text{Zn}(\text{L}^{\text{CF}_3})_2]$  (**6**) in Acetone- $\text{d}_6$ .

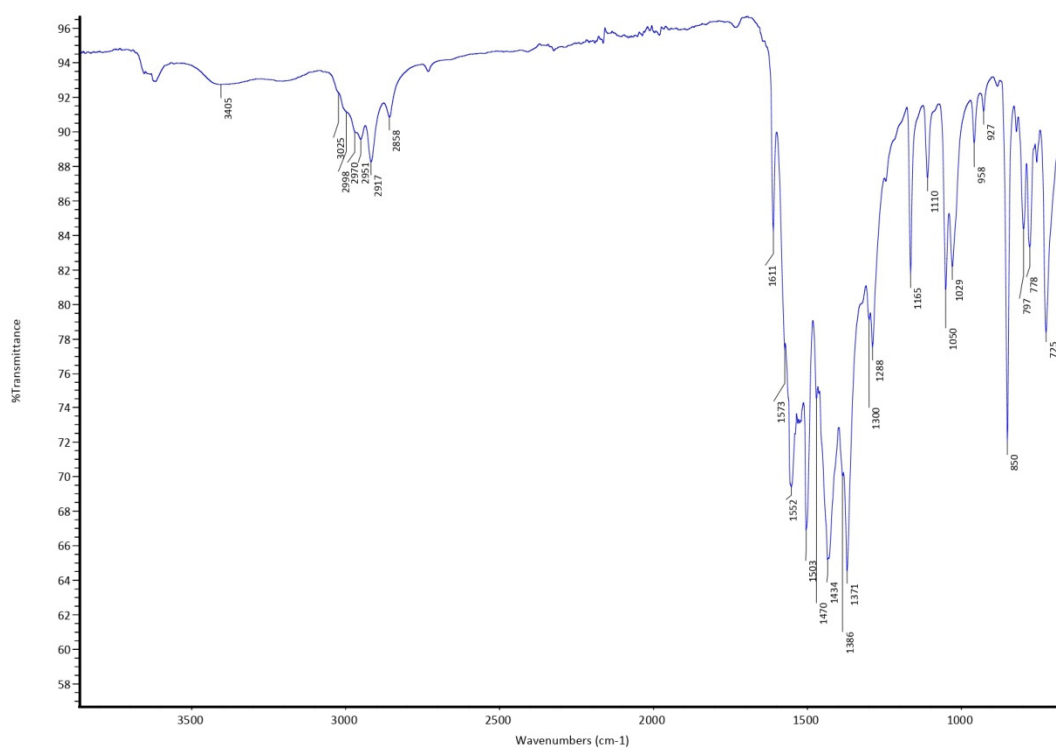

**Figure S31.** FT-IR spectrum of  $[\text{Mn}(\text{L}^{\text{Mes}})_2(\text{H}_2\text{O})_2]$  (**7**).

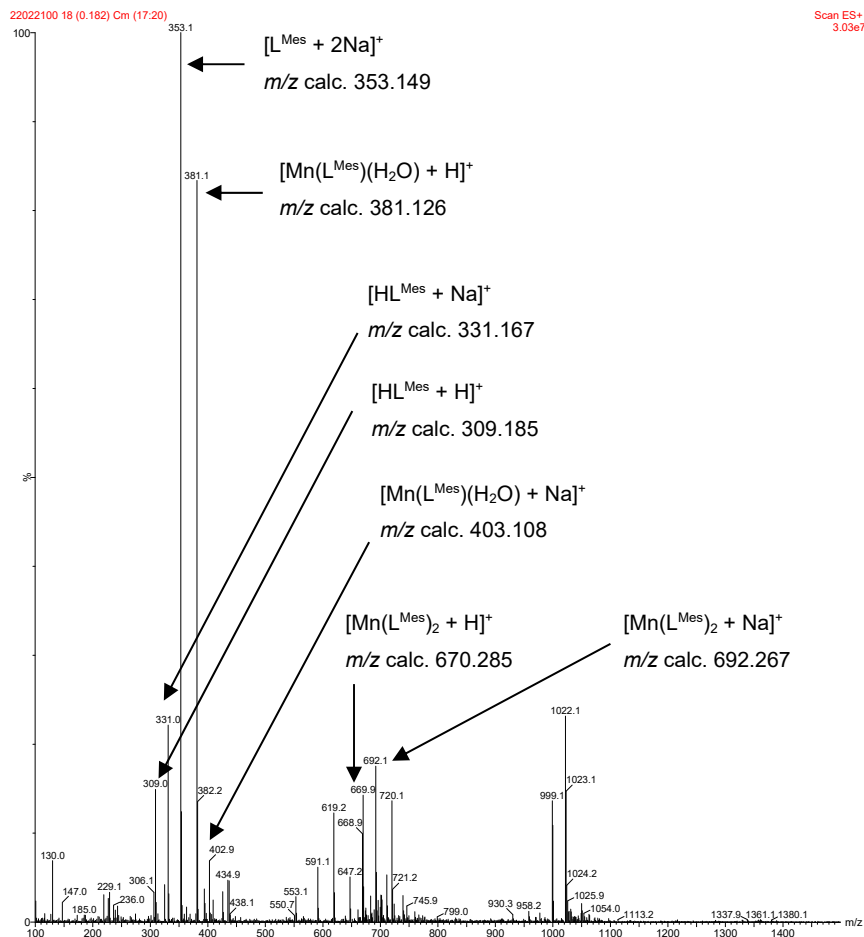

**Figure S32.** ESI-MS(+) spectrum of  $[Mn(L^{Mes})_2(H_2O)_2]$  (**7**) in  $CH_3OH$ .

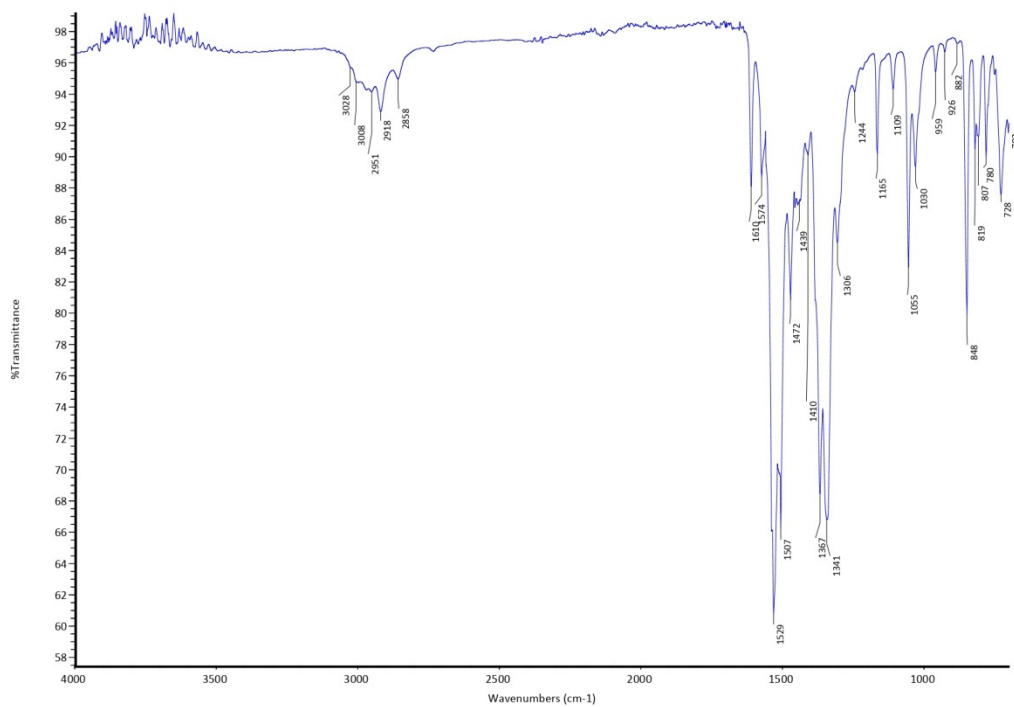

**Figure S33.** FT-IR spectrum of  $[Fe(L^{Mes})_2]$  (**8**).

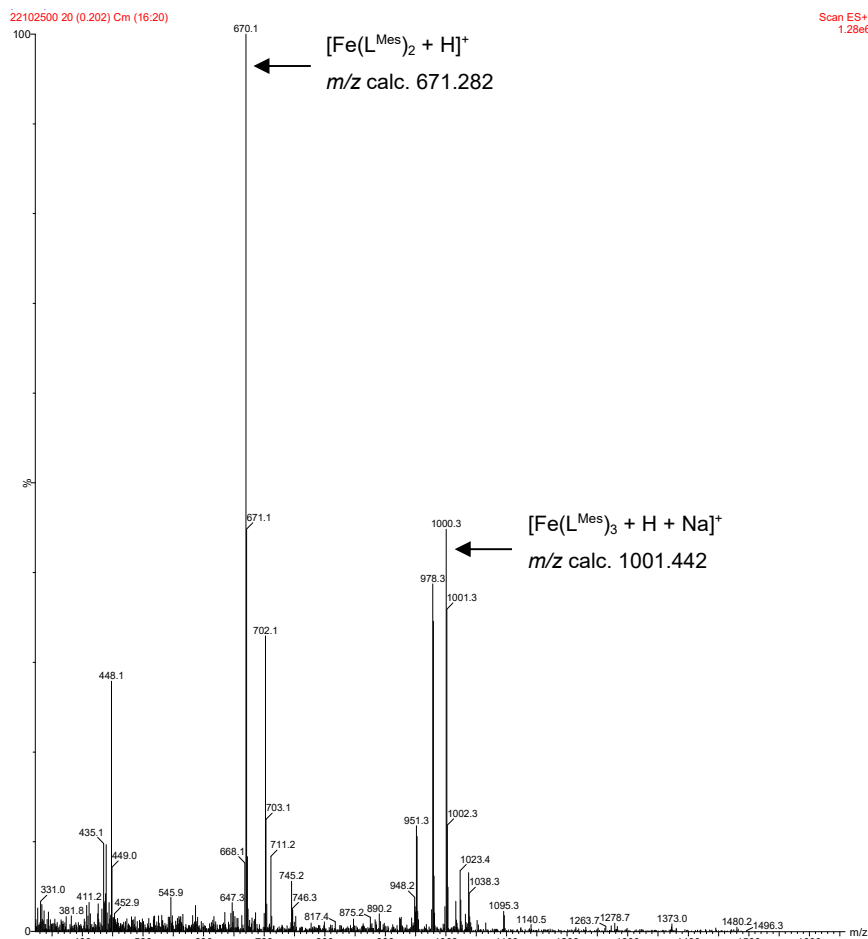

**Figure S34.** ESI-MS(+) spectrum of  $[\text{Fe}(\text{L}^{\text{Mes}})_2]$  (**8**) in  $\text{CH}_3\text{CN}$ .

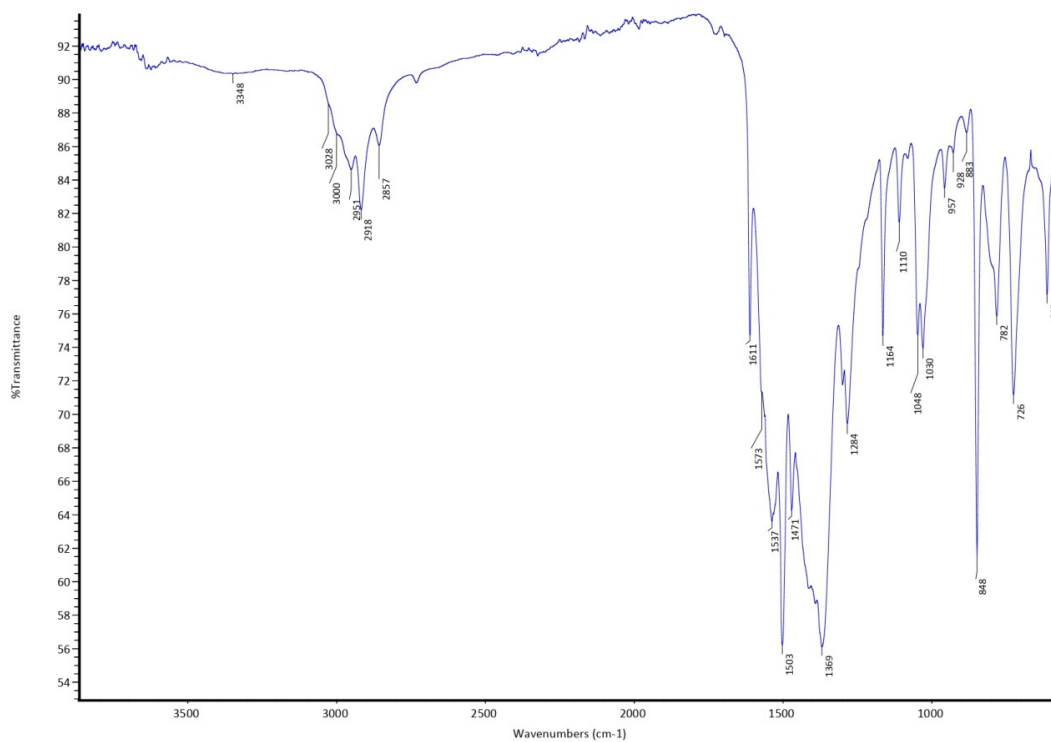

**Figure S35.** FT-IR spectrum of  $[\text{Co}(\text{L}^{\text{Mes}})_2(\text{H}_2\text{O})_2]$  (**9**).

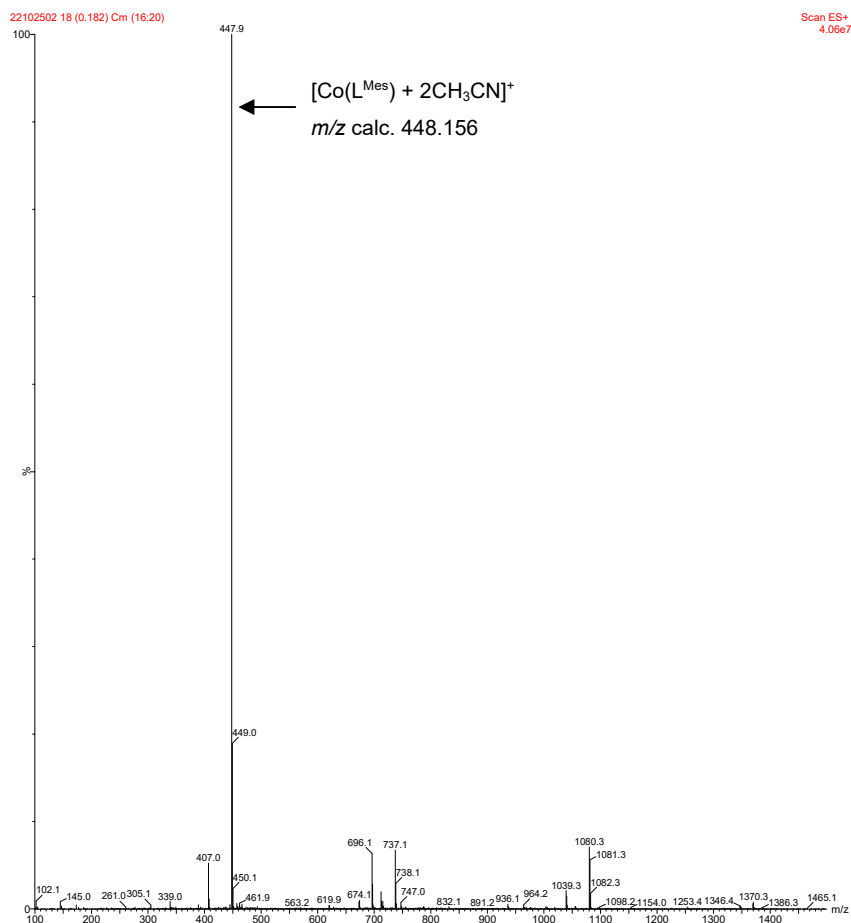

**Figure S36.** ESI-MS(+) spectrum of  $[\text{Co}(\text{L}^{\text{Mes}})_2(\text{H}_2\text{O})_2]$  (**9**) in  $\text{CH}_3\text{OH}/\text{CH}_3\text{CN}$ .

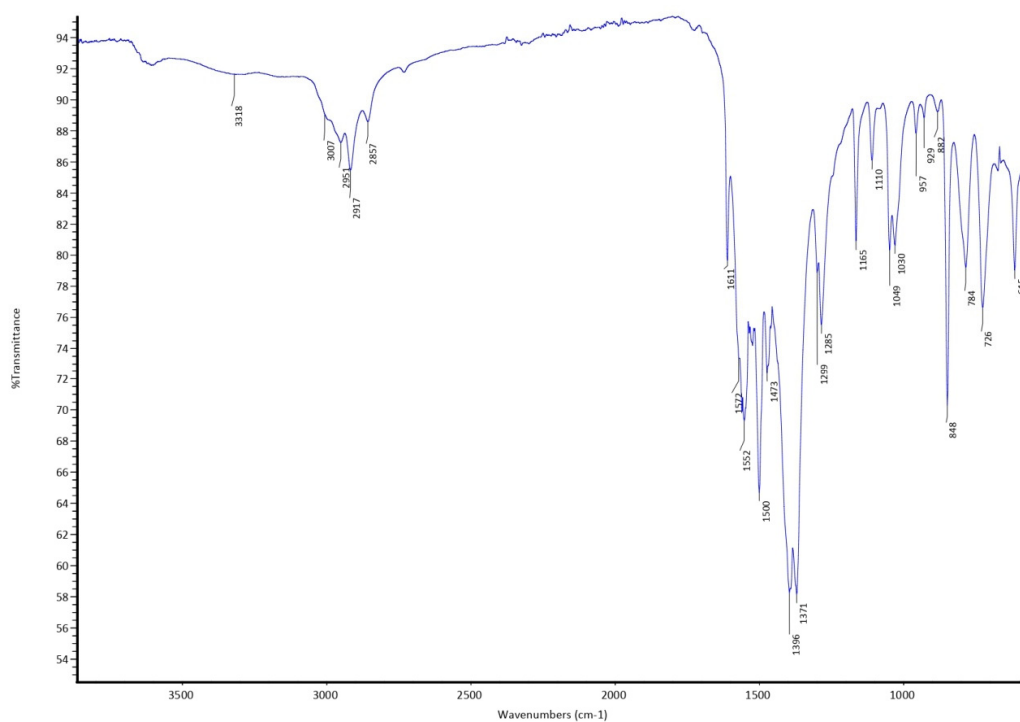

**Figure S37.** FT-IR spectrum of  $[\text{Ni}(\text{L}^{\text{Mes}})_2(\text{H}_2\text{O})_2]$  (**10**).

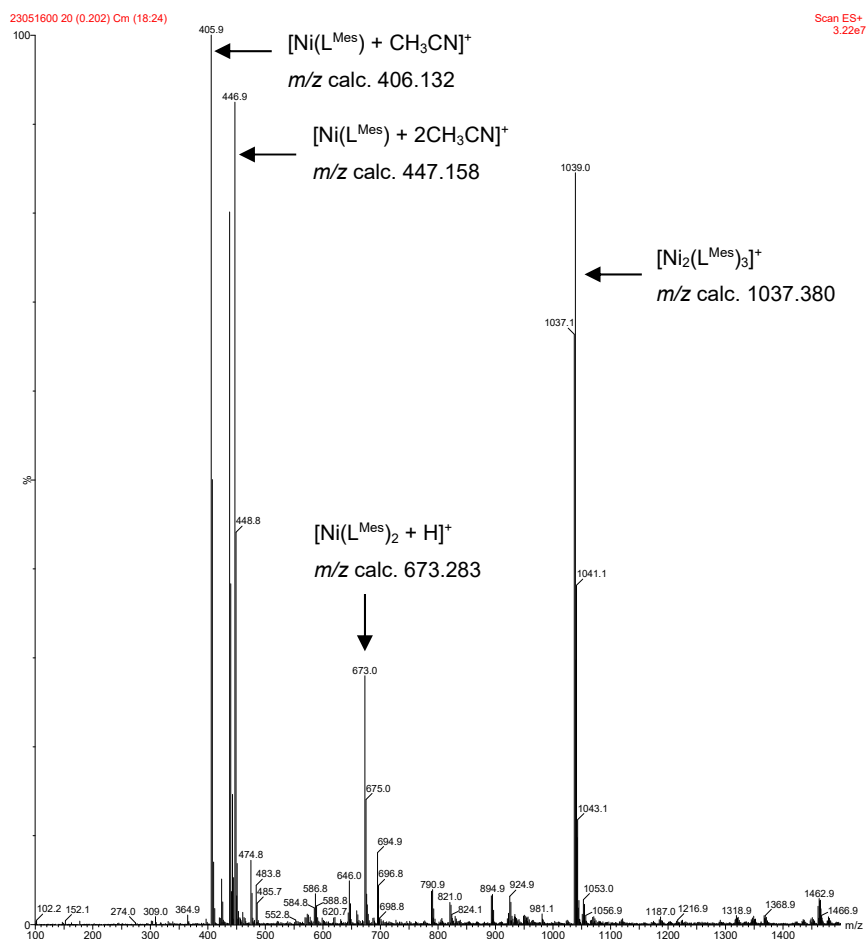

**Figure S38.** ESI-MS(+) spectrum of  $[\text{Ni}(\text{L}^{\text{Mes}})_2(\text{H}_2\text{O})_2]$  (**10**) in  $\text{CH}_3\text{CN}$ .

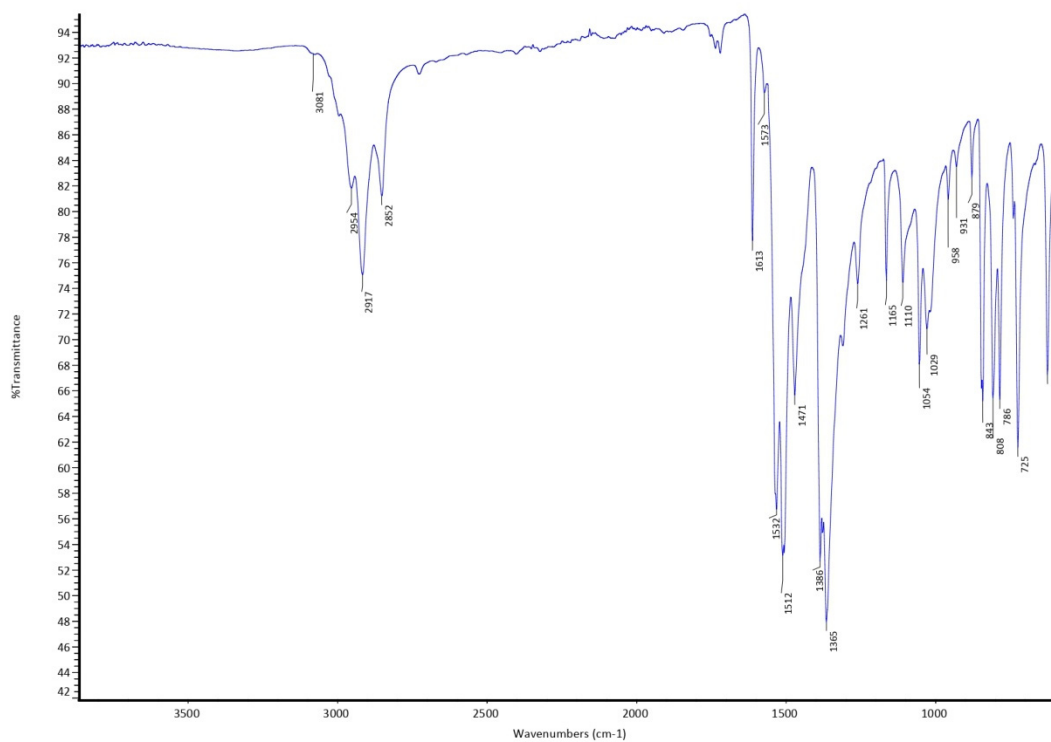

**Figure S39.** FT-IR spectrum of  $[\text{Cu}(\text{L}^{\text{Mes}})_2]$  (**11**).



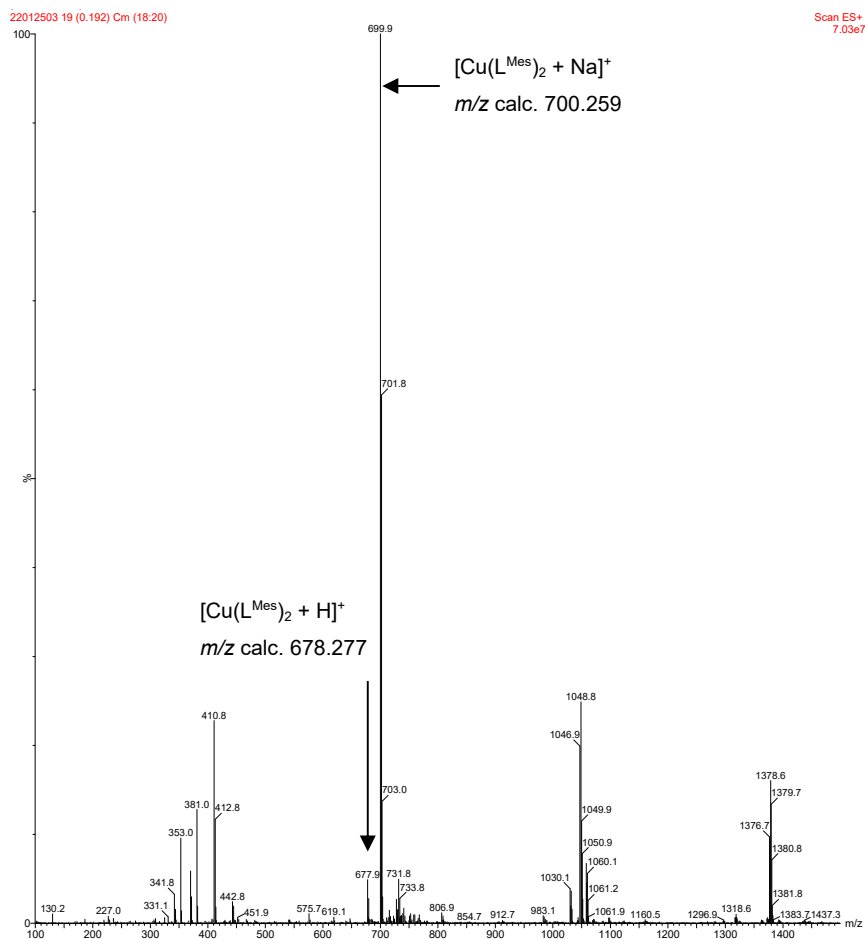

**Figure S40.** ESI-MS(+) spectrum of  $[\text{Cu}(\text{L}^{\text{Mes}})_2]$  (**11**) in  $\text{CH}_3\text{OH}$ .

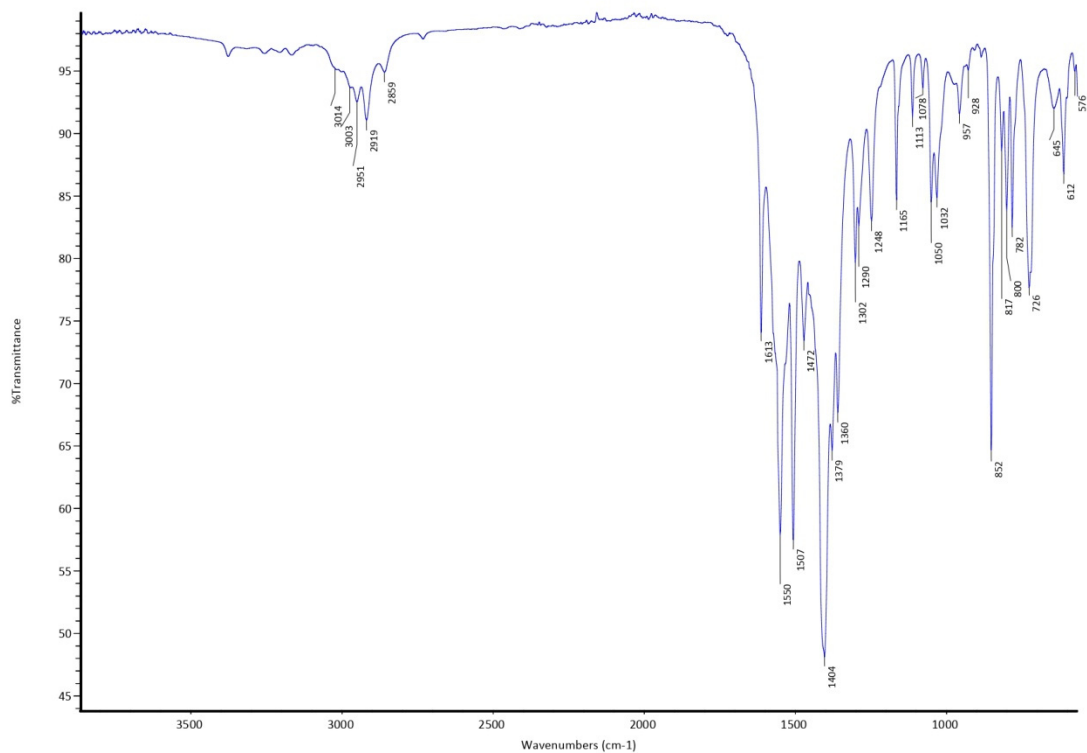

**Figure S41.** FT-IR spectrum of  $[\text{Zn}(\text{L}^{\text{Mes}})_2]$  (**12**).

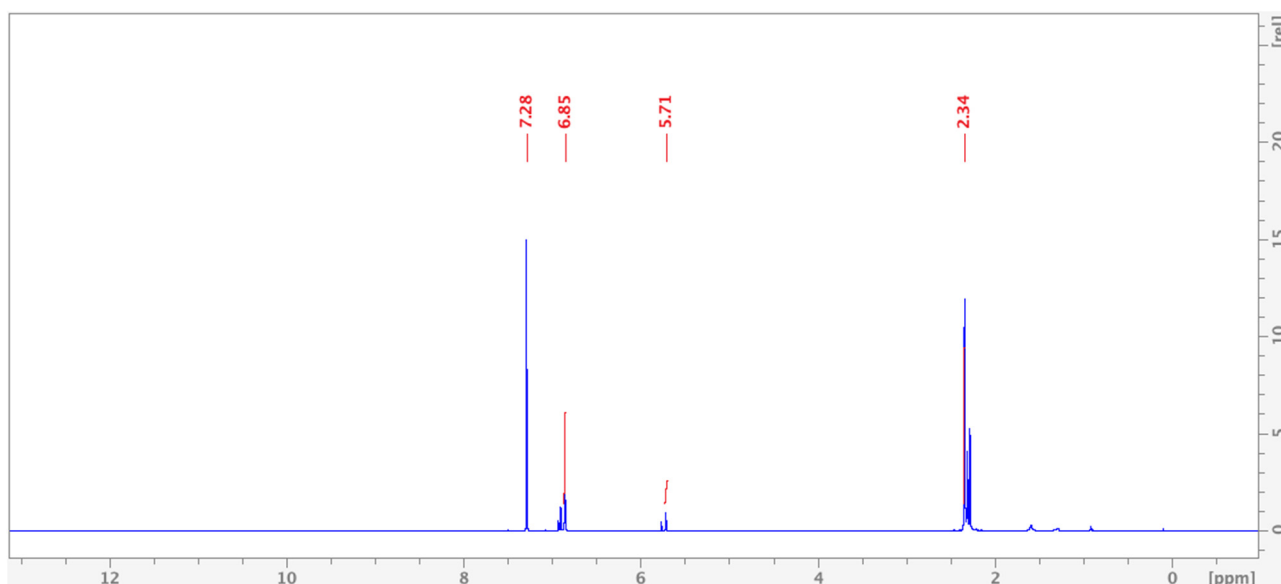

**Figure S42.**  $^1\text{H}$ -NMR spectrum of  $[\text{Zn}(\text{L}^{\text{Mes}})_2]$  (**12**) in  $\text{CDCl}_3$ .

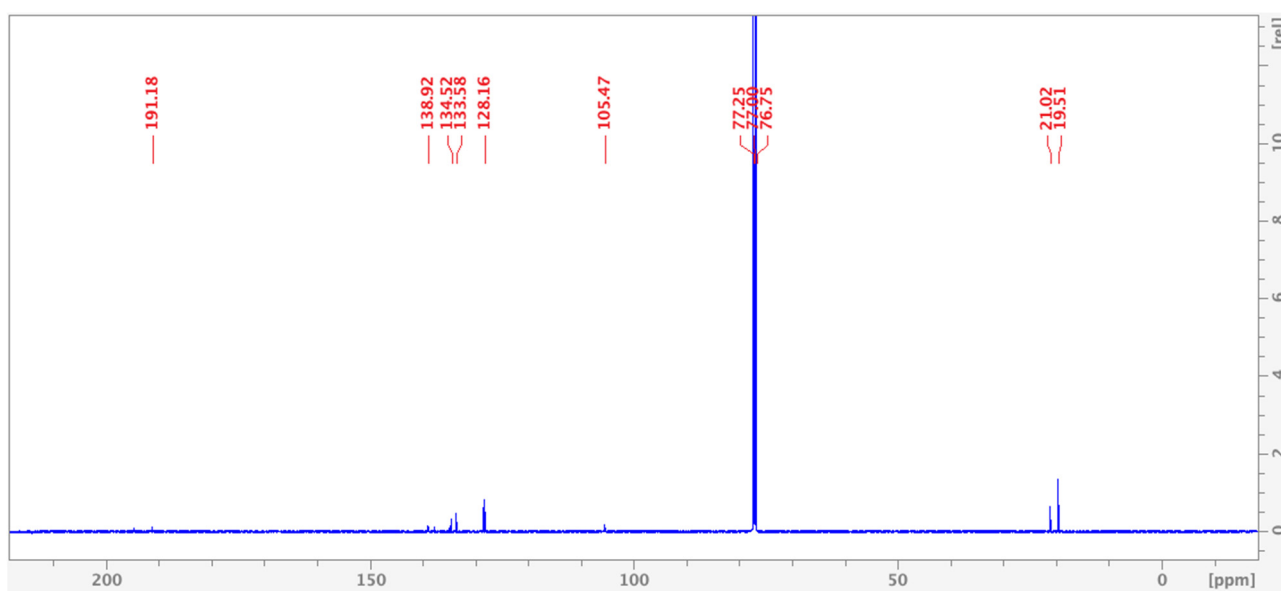

**Figure S43.**  $^{13}\text{C}\{^1\text{H}\}$ -NMR spectrum of  $[\text{Zn}(\text{L}^{\text{Mes}})_2]$  (**12**) in  $\text{CDCl}_3$ .

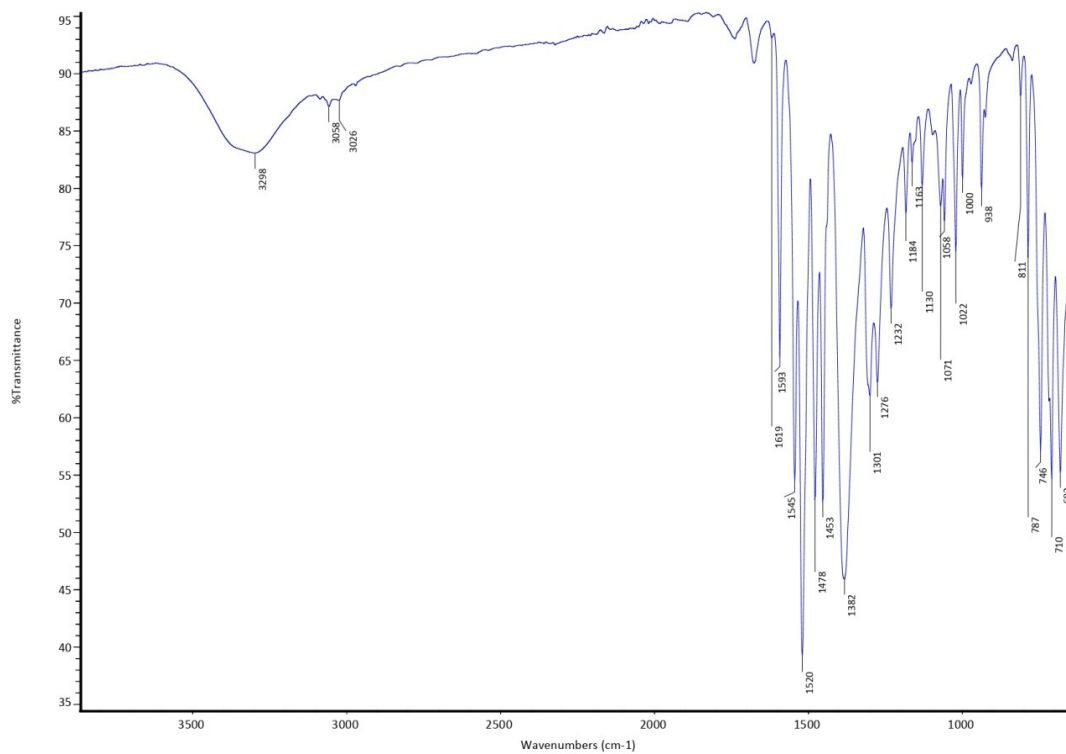

**Figure S44.** FT-IR spectrum of  $[\text{Mn}(\text{L}^{\text{Ph}})_2(\text{H}_2\text{O})_2]$  (**13**).

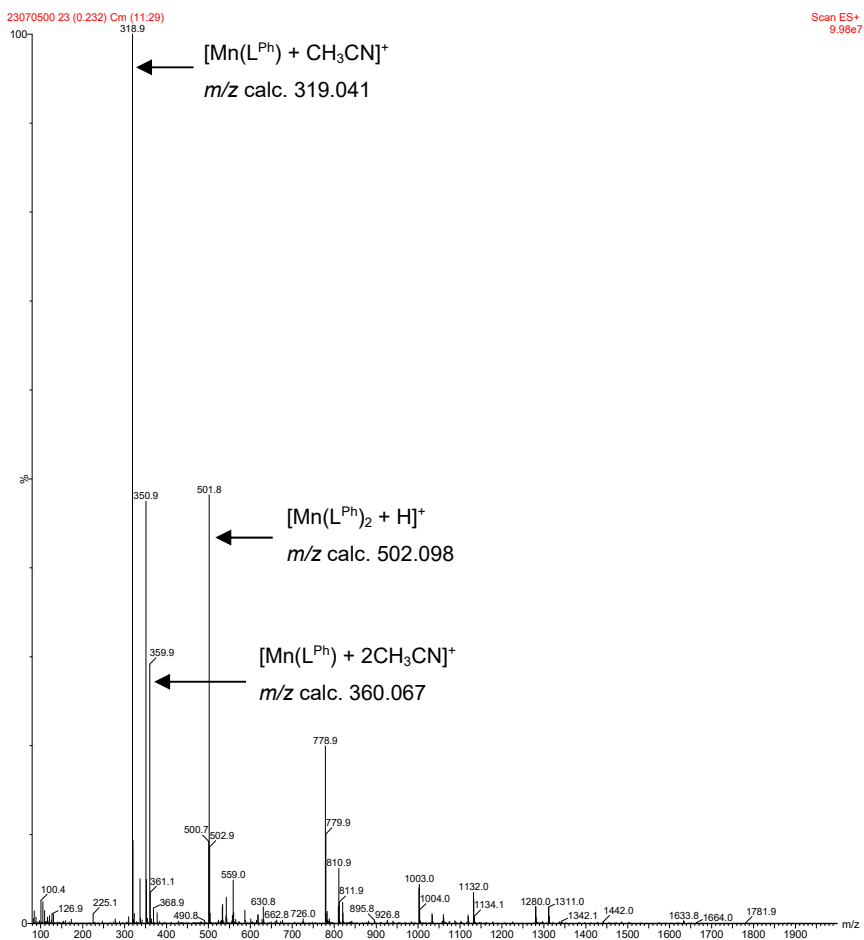

**Figure S45.** ESI-MS(+) spectrum of  $[\text{Mn}(\text{L}^{\text{Ph}})_2(\text{H}_2\text{O})_2]$  (**13**) in  $\text{CH}_3\text{OH}$ .

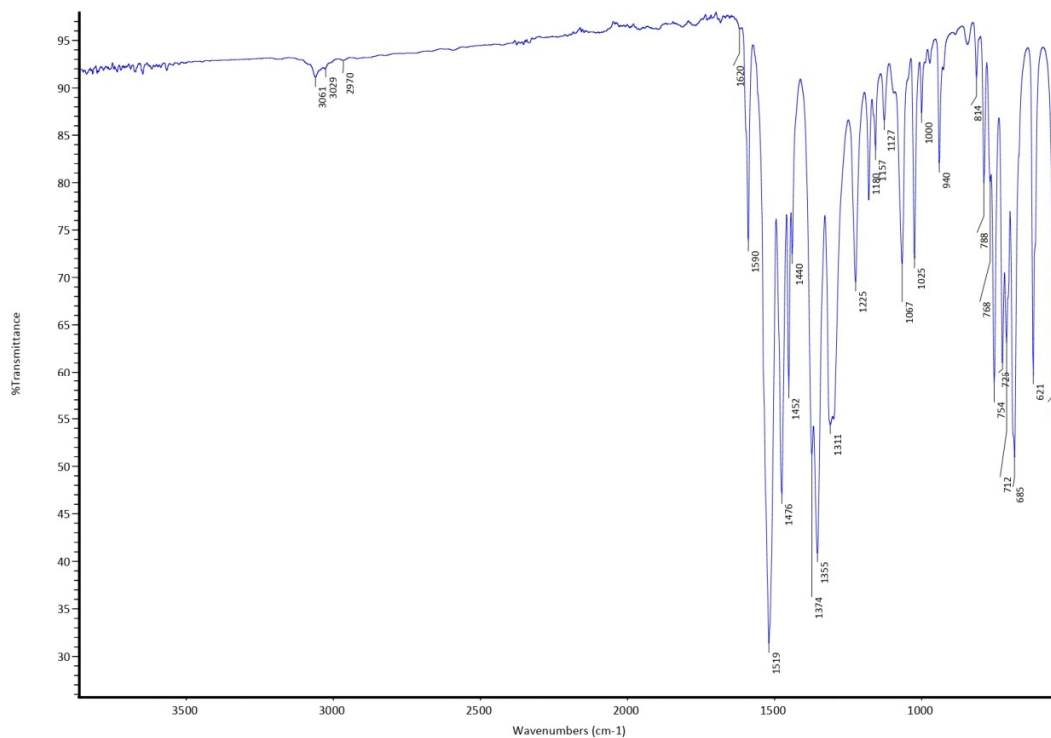

**Figure S46.** FT-IR spectrum of  $[\text{Fe}(\text{L}^{\text{Ph}})_2]$  (**14**).

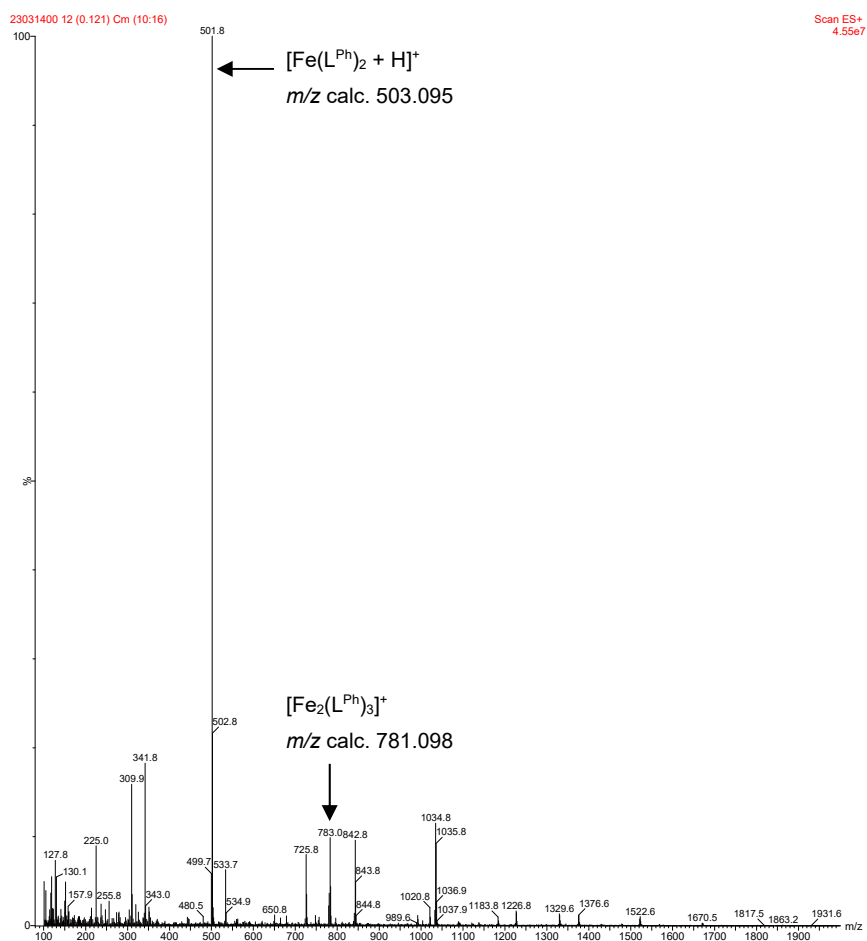

**Figure S47.** ESI-MS(+) spectrum of  $[\text{Fe}(\text{L}^{\text{Ph}})_2]$  (**14**) in  $\text{CH}_3\text{OH}/\text{CH}_3\text{CN}$ .

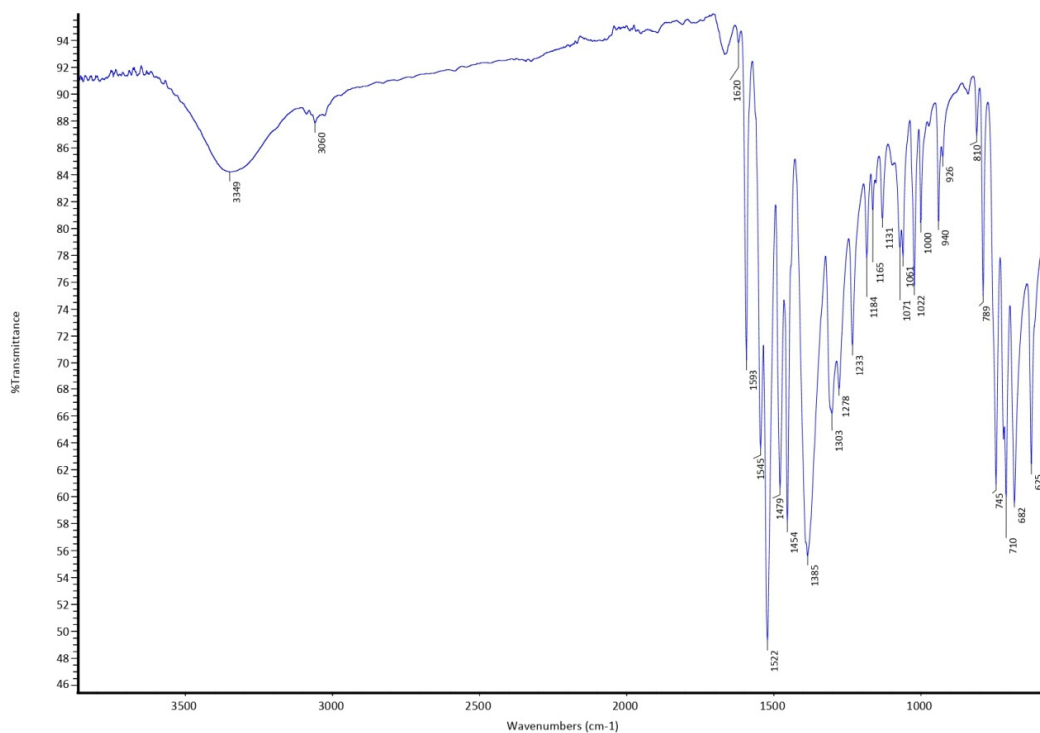

**Figure S48.** FT-IR spectrum of  $[\text{Co}(\text{L}^{\text{Ph}})_2(\text{H}_2\text{O})_2]$  (**15**).

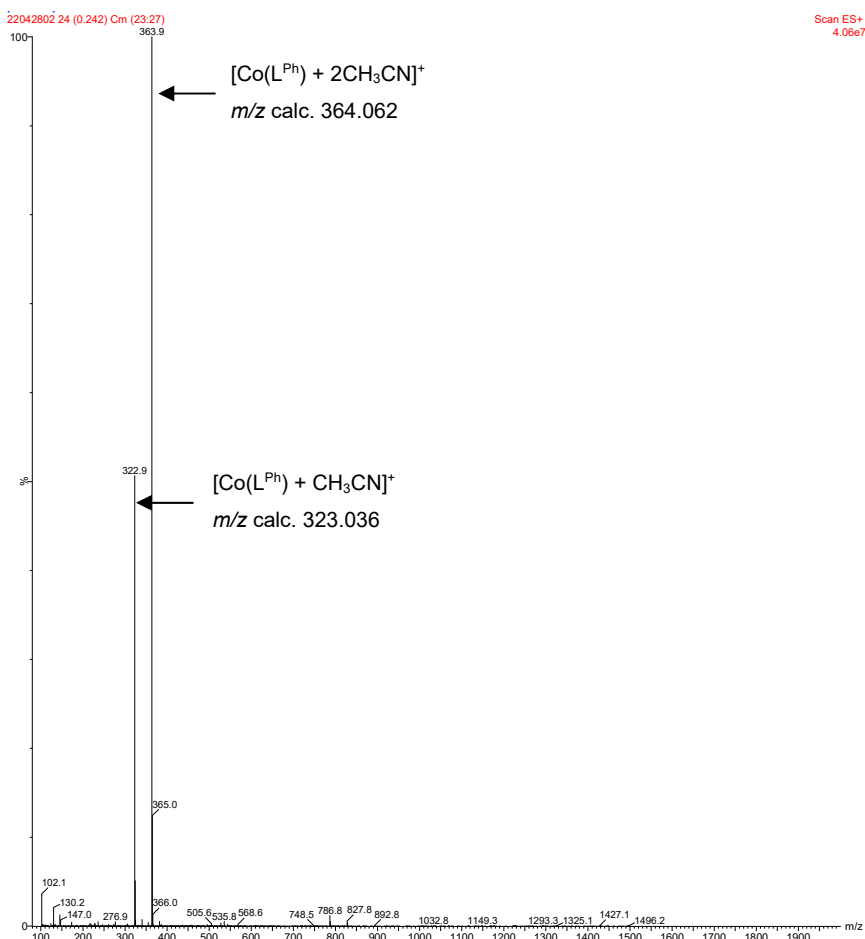

**Figure S49.** ESI-MS(+) spectrum of  $[\text{Co}(\text{L}^{\text{Ph}})_2(\text{H}_2\text{O})_2]$  (**15**) in  $\text{CH}_3\text{CN}$ .

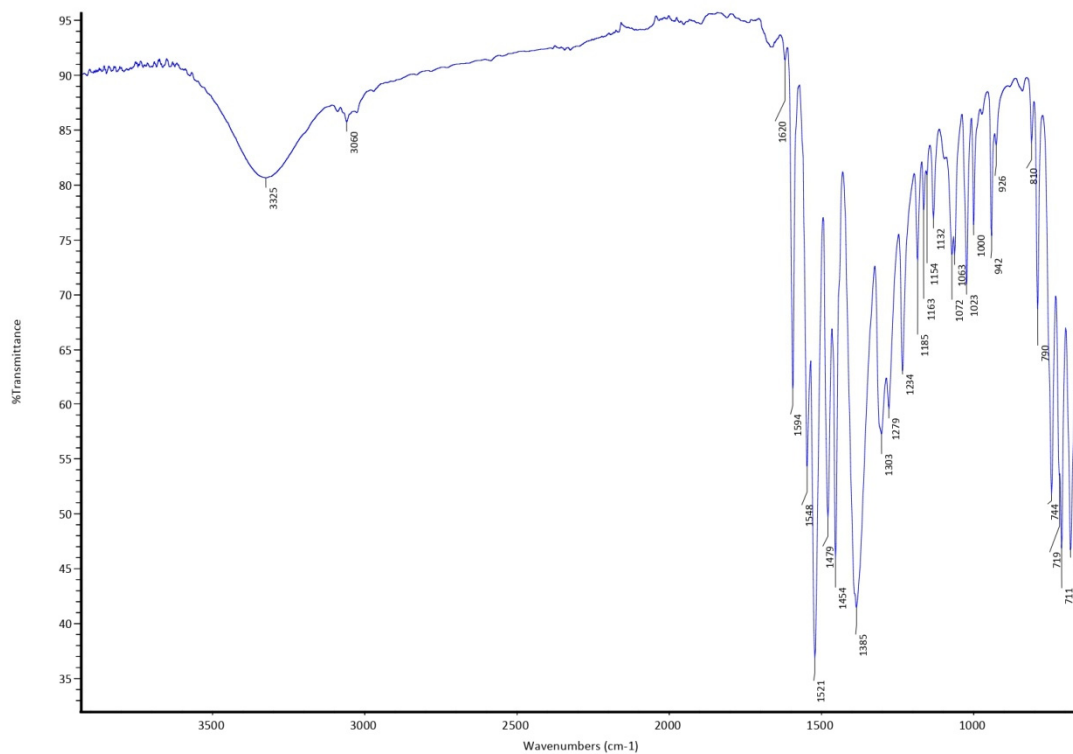

**Figure S50.** FT-IR spectrum of  $[\text{Ni}(\text{L}^{\text{Ph}})_2(\text{H}_2\text{O})_2]$  (**16**).

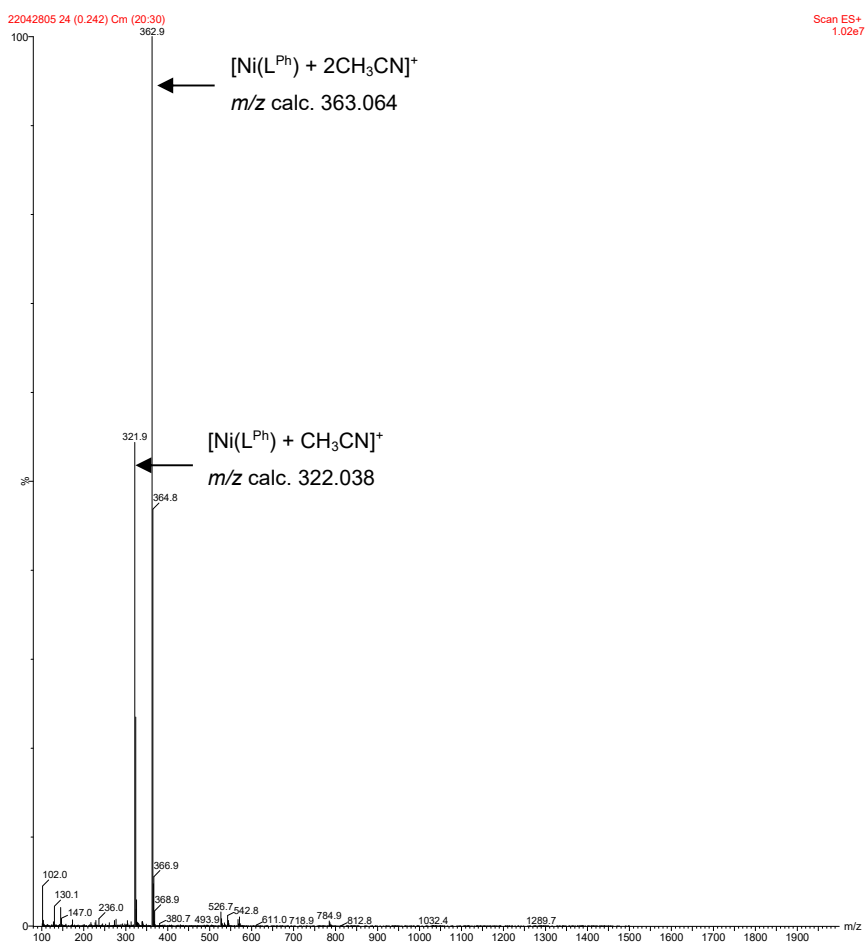

**Figure S51.** ESI-MS(+) spectrum of  $[\text{Ni}(\text{L}^{\text{Ph}})_2(\text{H}_2\text{O})_2]$  (**16**) in  $\text{CH}_3\text{CN}$ .

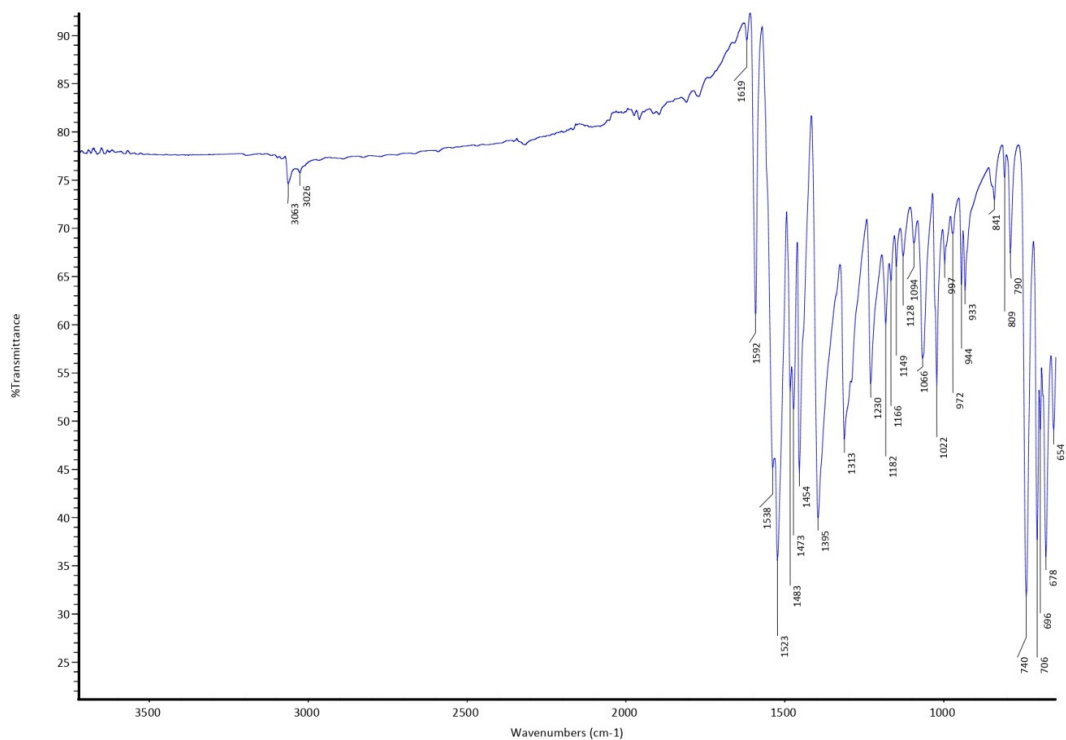

**Figure S52.** FT-IR spectrum of  $[\text{Cu}(\text{L}^{\text{Ph}})_2]$  (**17**).

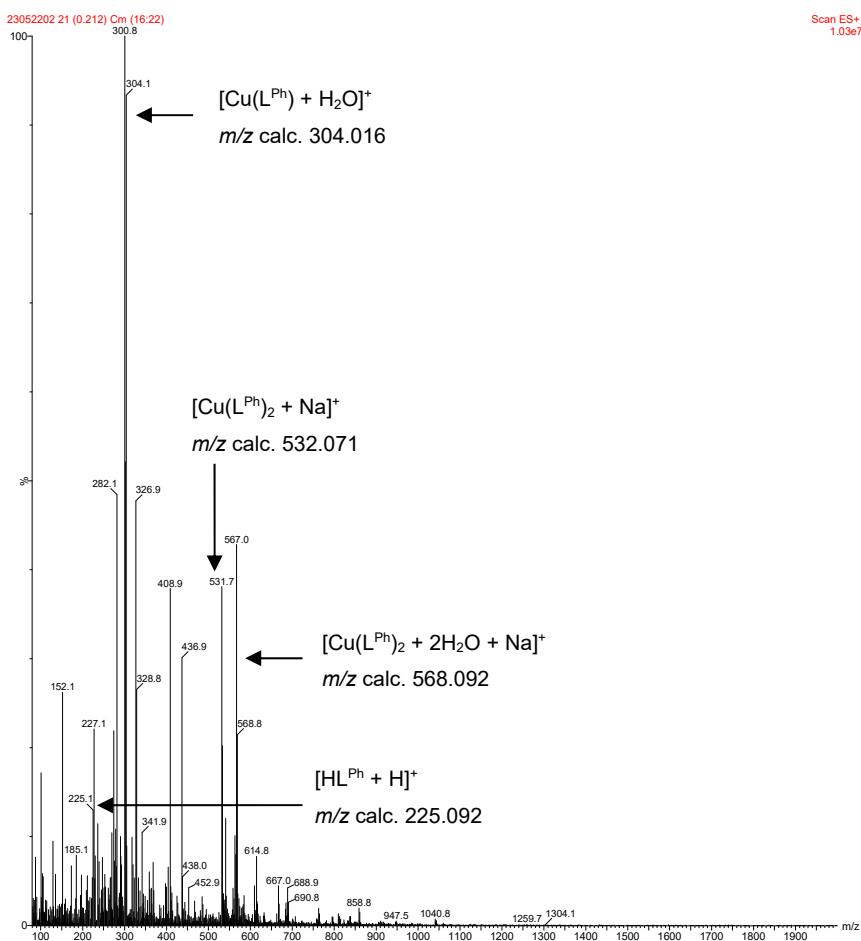

**Figure S53** ESI-MS(+) spectrum of  $[\text{Cu}(\text{L}^{\text{Ph}})_2]$  (**17**) in  $\text{CH}_3\text{OH}$ .

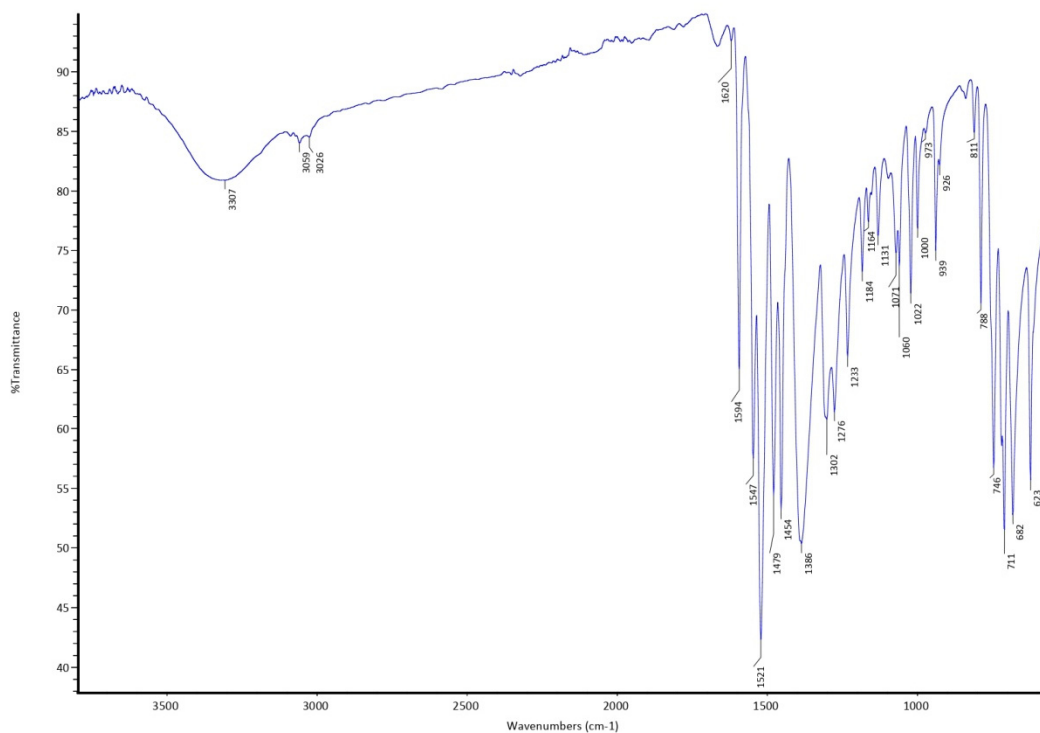

**Figure S54.** FT-IR spectrum of  $[\text{Zn}(\text{L}^{\text{Ph}})_2] \cdot 2\text{H}_2\text{O}$  (**18**).

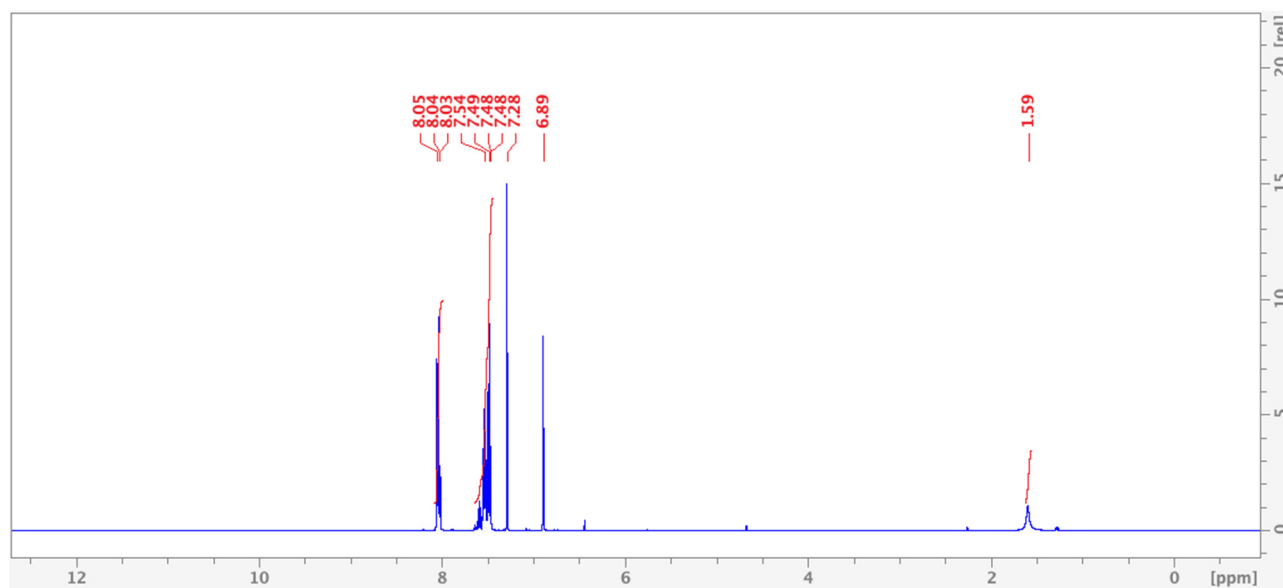

**Figure S55.**  $^1\text{H}$ -NMR spectrum of  $[\text{Zn}(\text{L}^{\text{Ph}})_2] \cdot 2\text{H}_2\text{O}$  (**18**) in  $\text{CDCl}_3$ .



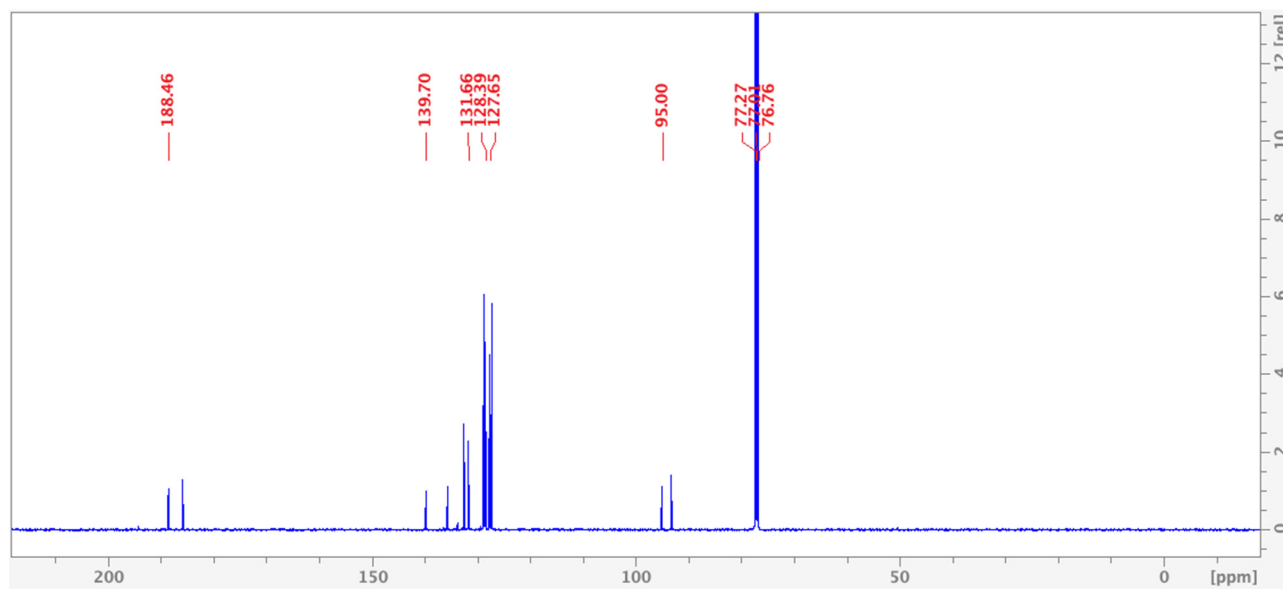

**Figure S56.**  $^{13}\text{C}\{^1\text{H}\}$ -NMR spectrum of  $[\text{Zn}(\text{L}^{\text{Ph}})_2] \cdot 2\text{H}_2\text{O}$  (**18**) in  $\text{CDCl}_3$ .

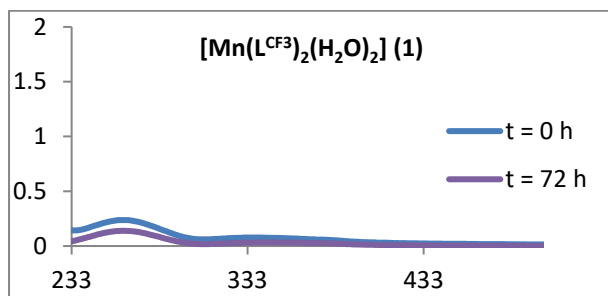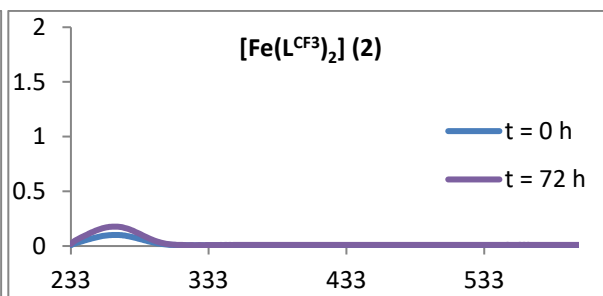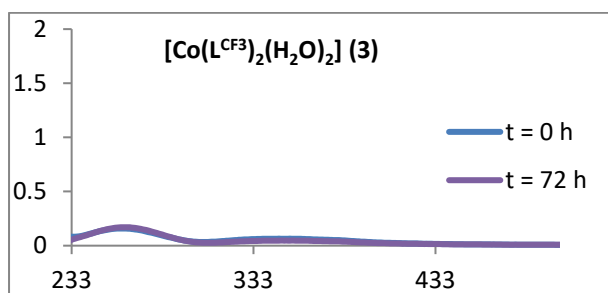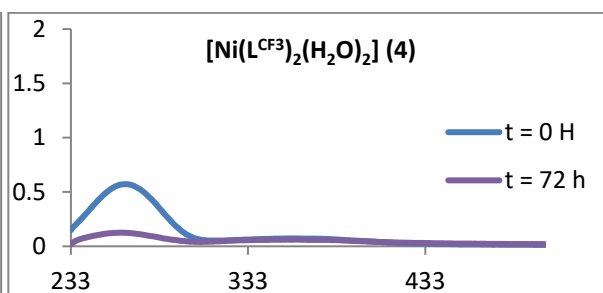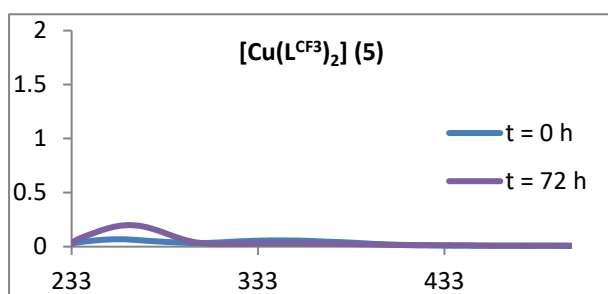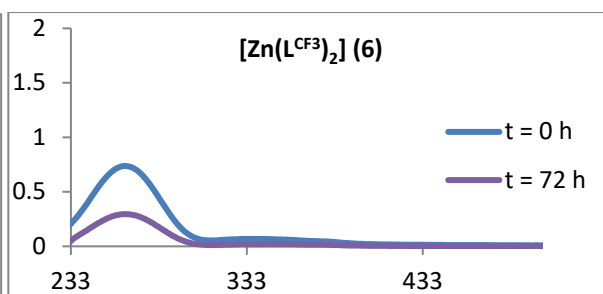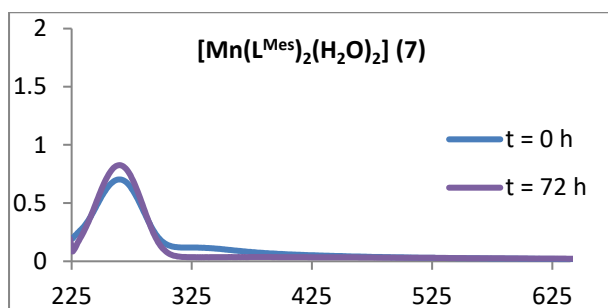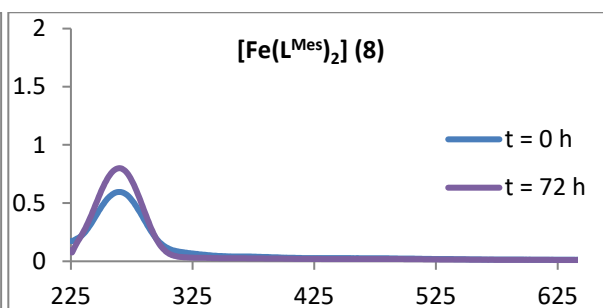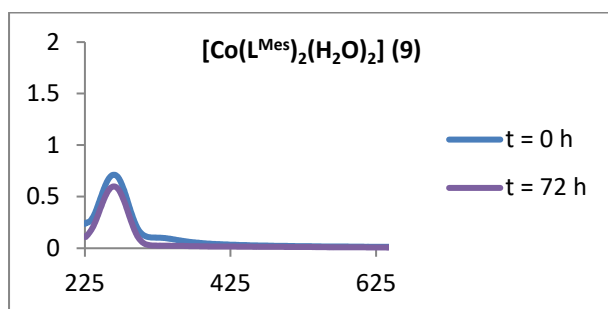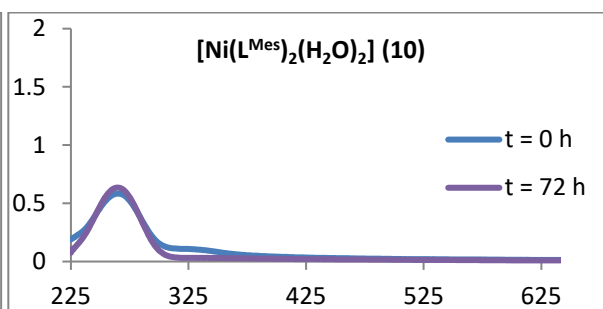

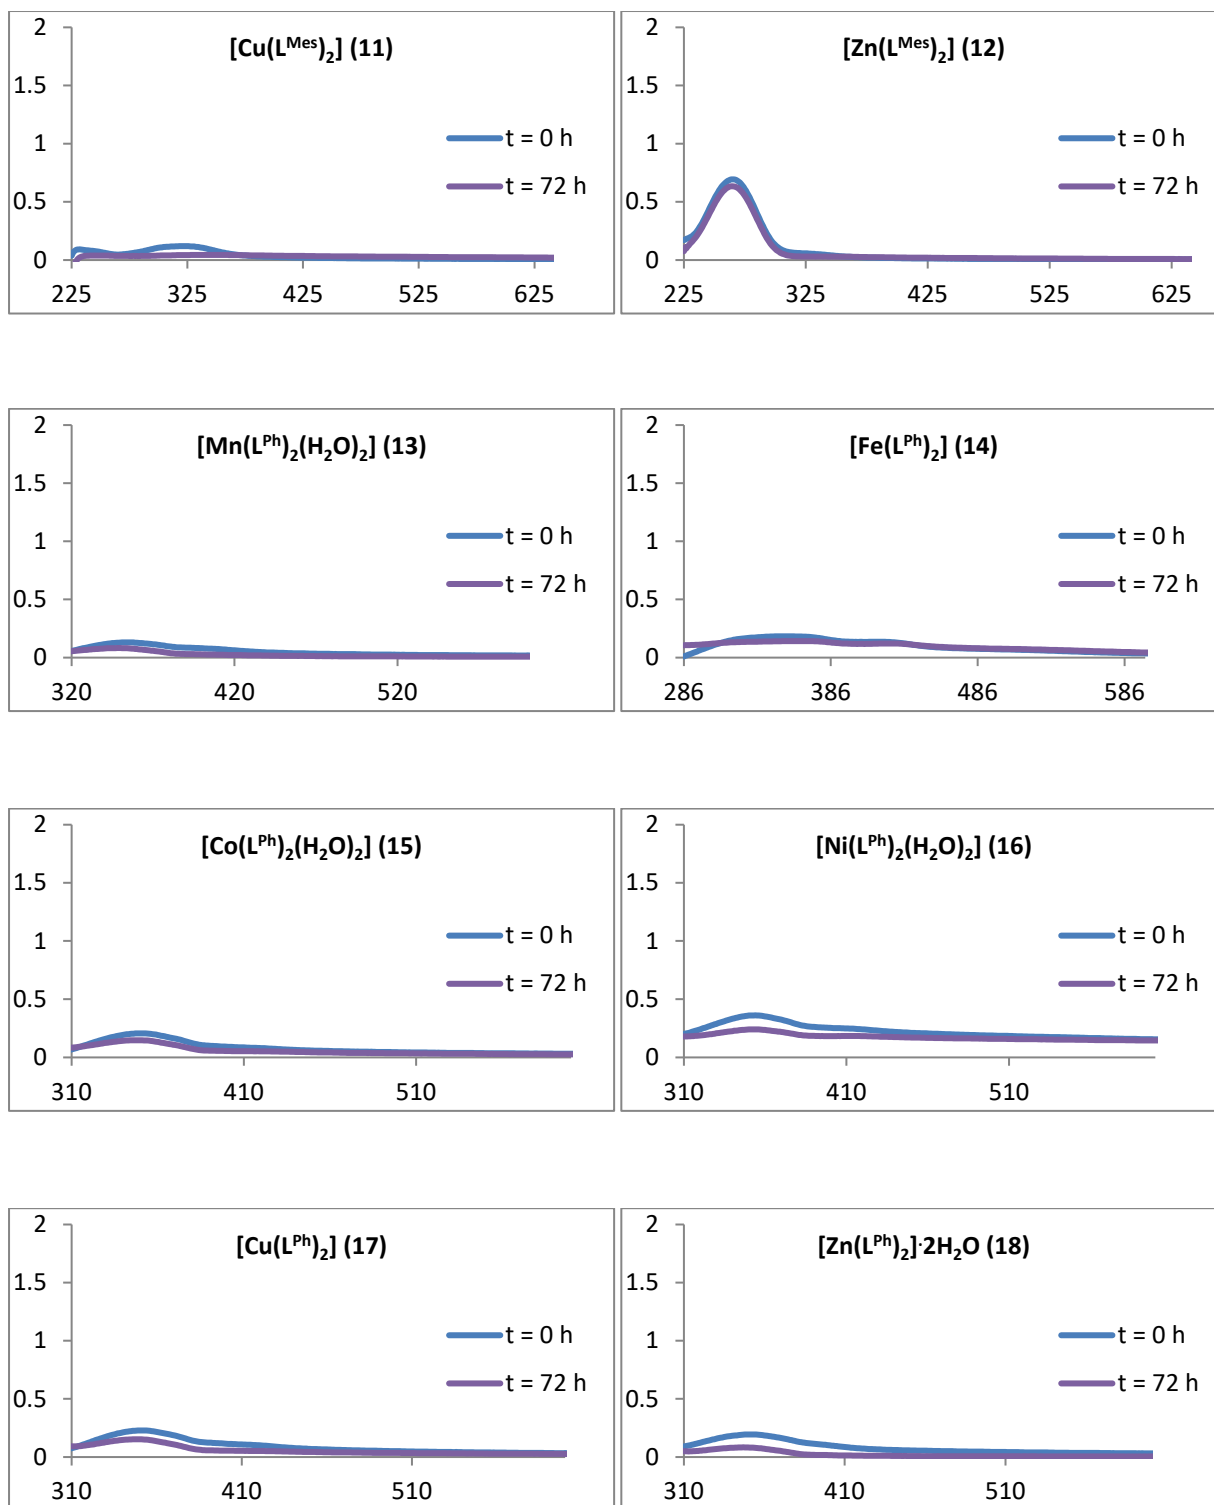

**Figure S57.** Stability studies. All complexes were dissolved at 50  $\mu$ M in 0.5% DMSO/ physiological solution. UV-Visible spectra were recorded at  $t = 0$  h and  $t = 72$  h.

| <b>Table S1.</b> Crystal data and structure refinement for [Cu(L <sup>Mes</sup> ) <sub>2</sub> ] ( <b>11</b> ). |                                                               |
|-----------------------------------------------------------------------------------------------------------------|---------------------------------------------------------------|
| Identification code                                                                                             | dia39_0m_a                                                    |
| Empirical formula                                                                                               | C <sub>42</sub> H <sub>46</sub> CuO <sub>4</sub>              |
| Formula weight                                                                                                  | 678.33                                                        |
| Temperature/K                                                                                                   | 100.03                                                        |
| Crystal system                                                                                                  | monoclinic                                                    |
| Space group                                                                                                     | C2/c                                                          |
| a/Å                                                                                                             | 21.2012(19)                                                   |
| b/Å                                                                                                             | 10.8405(10)                                                   |
| c/Å                                                                                                             | 16.7071(15)                                                   |
| α/°                                                                                                             | 90                                                            |
| β/°                                                                                                             | 112.3000(10)                                                  |
| γ/°                                                                                                             | 90                                                            |
| Volume/Å <sup>3</sup>                                                                                           | 3552.6(6)                                                     |
| Z                                                                                                               | 4                                                             |
| ρ <sub>calc</sub> /g/cm <sup>3</sup>                                                                            | 1.268                                                         |
| μ/mm <sup>-1</sup>                                                                                              | 0.655                                                         |
| F(000)                                                                                                          | 1436.0                                                        |
| Crystal size/mm <sup>3</sup>                                                                                    | 0.34 × 0.11 × 0.05                                            |
| Radiation                                                                                                       | Mo Kα (λ = 0.71073)                                           |
| 2θ range for data collection/°                                                                                  | 4.152 to 62.122                                               |
| Index ranges                                                                                                    | -30 ≤ h ≤ 29, -14 ≤ k ≤ 14, -23 ≤ l ≤ 23                      |
| Reflections collected                                                                                           | 20246                                                         |
| Independent reflections                                                                                         | 5227 [R <sub>int</sub> = 0.0284, R <sub>sigma</sub> = 0.0275] |
| Data/restraints/parameters                                                                                      | 5227/0/220                                                    |
| Goodness-of-fit on F <sup>2</sup>                                                                               | 1.048                                                         |
| Final R indexes [I ≥ 2σ (I)]                                                                                    | R <sub>1</sub> = 0.0331, wR <sub>2</sub> = 0.0872             |
| Final R indexes [all data]                                                                                      | R <sub>1</sub> = 0.0416, wR <sub>2</sub> = 0.0915             |
| Largest diff. peak/hole / e Å <sup>-3</sup>                                                                     | 0.52/-0.30                                                    |

| Table S2. Bond Lengths for [Cu(L <sup>Mes</sup> ) <sub>2</sub> ] ( <b>11</b> ). |                 |            |  |      |      |            |
|---------------------------------------------------------------------------------|-----------------|------------|--|------|------|------------|
| Atom                                                                            | Atom            | Length/Å   |  | Atom | Atom | Length/Å   |
| Cu                                                                              | O1 <sup>1</sup> | 1.9166(9)  |  | C6   | C7   | 1.390(2)   |
| Cu                                                                              | O1              | 1.9166(9)  |  | C7   | C8   | 1.389(2)   |
| Cu                                                                              | O2 <sup>1</sup> | 1.9070(9)  |  | C7   | C11  | 1.5080(19) |
| Cu                                                                              | O2              | 1.9071(9)  |  | C8   | C9   | 1.3973(18) |
| O1                                                                              | C1              | 1.2763(15) |  | C9   | C12  | 1.5069(19) |
| O2                                                                              | C3              | 1.2768(15) |  | C13  | C14  | 1.4032(18) |
| C1                                                                              | C2              | 1.3973(18) |  | C13  | C18  | 1.3968(18) |
| C1                                                                              | C4              | 1.5024(17) |  | C14  | C15  | 1.3898(18) |
| C2                                                                              | C3              | 1.3967(17) |  | C14  | C19  | 1.5077(18) |
| C3                                                                              | C13             | 1.4995(17) |  | C15  | C16  | 1.3953(19) |
| C4                                                                              | C5              | 1.4012(19) |  | C16  | C17  | 1.3892(19) |
| C4                                                                              | C9              | 1.3980(19) |  | C16  | C20  | 1.5079(17) |
| C5                                                                              | C6              | 1.3936(18) |  | C17  | C18  | 1.3955(18) |
| C5                                                                              | C10             | 1.5050(19) |  | C18  | C21  | 1.5061(19) |

<sup>1</sup>1/2-X,3/2-Y,-Z

**Table S3.** Bond Angles for [Cu(L<sup>Mes</sup>)<sub>2</sub>] (**11**).

| Atom            | Atom | Atom            | Angle/°    |  | Atom | Atom | Atom | Angle/°    |
|-----------------|------|-----------------|------------|--|------|------|------|------------|
| O1              | Cu   | O1 <sup>1</sup> | 180.0      |  | C6   | C7   | C11  | 120.58(14) |
| O2 <sup>1</sup> | Cu   | O1              | 86.33(4)   |  | C8   | C7   | C6   | 118.28(12) |
| O2              | Cu   | O1              | 93.67(4)   |  | C8   | C7   | C11  | 121.13(14) |
| O2 <sup>1</sup> | Cu   | O1 <sup>1</sup> | 93.67(4)   |  | C7   | C8   | C9   | 121.93(13) |
| O2              | Cu   | O1 <sup>1</sup> | 86.33(4)   |  | C4   | C9   | C12  | 121.79(12) |
| O2 <sup>1</sup> | Cu   | O2              | 180.0      |  | C8   | C9   | C4   | 118.47(12) |
| C1              | O1   | Cu              | 125.70(8)  |  | C8   | C9   | C12  | 119.75(13) |
| C3              | O2   | Cu              | 125.98(8)  |  | C14  | C13  | C3   | 119.03(11) |
| O1              | C1   | C2              | 125.33(12) |  | C18  | C13  | C3   | 120.07(11) |
| O1              | C1   | C4              | 115.61(11) |  | C18  | C13  | C14  | 120.88(11) |
| C2              | C1   | C4              | 119.05(11) |  | C13  | C14  | C19  | 120.81(12) |
| C3              | C2   | C1              | 123.88(12) |  | C15  | C14  | C13  | 118.76(12) |
| O2              | C3   | C2              | 125.28(12) |  | C15  | C14  | C19  | 120.43(12) |
| O2              | C3   | C13             | 116.75(11) |  | C14  | C15  | C16  | 121.61(12) |
| C2              | C3   | C13             | 117.97(11) |  | C15  | C16  | C20  | 120.29(12) |
| C5              | C4   | C1              | 118.48(12) |  | C17  | C16  | C15  | 118.24(12) |
| C9              | C4   | C1              | 120.67(12) |  | C17  | C16  | C20  | 121.47(12) |
| C9              | C4   | C5              | 120.85(11) |  | C16  | C17  | C18  | 121.99(12) |
| C4              | C5   | C10             | 121.12(12) |  | C13  | C18  | C21  | 120.97(12) |
| C6              | C5   | C4              | 118.65(12) |  | C17  | C18  | C13  | 118.42(12) |
| C6              | C5   | C10             | 120.22(13) |  | C17  | C18  | C21  | 120.61(12) |
| C7              | C6   | C5              | 121.80(13) |  |      |      |      |            |

<sup>1</sup>1/2-X,3/2-Y,-Z

| <b>Table S4.</b> Crystal data and structure refinement for [Zn(L <sup>Mes</sup> ) <sub>2</sub> ] ( <b>12</b> ). |                                                                |
|-----------------------------------------------------------------------------------------------------------------|----------------------------------------------------------------|
| Identification code                                                                                             | dia100_0m_a                                                    |
| Empirical formula                                                                                               | C <sub>42</sub> H <sub>46</sub> O <sub>4</sub> Zn              |
| Formula weight                                                                                                  | 680.16                                                         |
| Temperature/K                                                                                                   | 99.98                                                          |
| Crystal system                                                                                                  | triclinic                                                      |
| Space group                                                                                                     | P-1                                                            |
| a/Å                                                                                                             | 11.7040(14)                                                    |
| b/Å                                                                                                             | 12.0704(14)                                                    |
| c/Å                                                                                                             | 13.6623(16)                                                    |
| α/°                                                                                                             | 104.205(2)                                                     |
| β/°                                                                                                             | 99.304(2)                                                      |
| γ/°                                                                                                             | 101.855(2)                                                     |
| Volume/Å <sup>3</sup>                                                                                           | 1784.8(4)                                                      |
| Z                                                                                                               | 2                                                              |
| ρ <sub>calc</sub> /g/cm <sup>3</sup>                                                                            | 1.266                                                          |
| μ/mm <sup>-1</sup>                                                                                              | 0.729                                                          |
| F(000)                                                                                                          | 720.0                                                          |
| Crystal size/mm <sup>3</sup>                                                                                    | 0.35 × 0.342 × 0.057                                           |
| Radiation                                                                                                       | Mo Kα (λ = 0.71073)                                            |
| 2θ range for data collection/°                                                                                  | 3.154 to 61.966                                                |
| Index ranges                                                                                                    | -16 ≤ h ≤ 16, -16 ≤ k ≤ 16, -19 ≤ l ≤ 19                       |
| Reflections collected                                                                                           | 18950                                                          |
| Independent reflections                                                                                         | 10255 [R <sub>int</sub> = 0.0235, R <sub>sigma</sub> = 0.0393] |
| Data/restraints/parameters                                                                                      | 10255/0/436                                                    |
| Goodness-of-fit on F <sup>2</sup>                                                                               | 1.037                                                          |
| Final R indexes [I ≥ 2σ (I)]                                                                                    | R <sub>1</sub> = 0.0364, wR <sub>2</sub> = 0.0964              |
| Final R indexes [all data]                                                                                      | R <sub>1</sub> = 0.0454, wR <sub>2</sub> = 0.1006              |
| Largest diff. peak/hole / e Å <sup>-3</sup>                                                                     | 0.48/-0.53                                                     |

**Table S5.** Bond Lengths for [Zn(L<sup>Mes</sup>)<sub>2</sub>] (**12**).

| Atom | Atom | Length/Å   |  | Atom | Atom | Length/Å   |
|------|------|------------|--|------|------|------------|
| Zn   | O1   | 1.9426(11) |  | C16  | C17  | 1.393(2)   |
| Zn   | O2   | 1.9282(11) |  | C16  | C20  | 1.508(2)   |
| Zn   | O3   | 1.9384(10) |  | C17  | C18  | 1.395(2)   |
| Zn   | O4   | 1.9435(11) |  | C18  | C21  | 1.510(2)   |
| O1   | C1   | 1.2764(17) |  | C22  | C23  | 1.402(2)   |
| O2   | C3   | 1.2826(17) |  | C22  | C25  | 1.4991(19) |
| O3   | C22  | 1.2835(16) |  | C23  | C24  | 1.401(2)   |
| O4   | C24  | 1.2807(17) |  | C24  | C34  | 1.4994(19) |
| C1   | C2   | 1.404(2)   |  | C25  | C26  | 1.407(2)   |
| C1   | C4   | 1.4952(19) |  | C25  | C30  | 1.407(2)   |
| C2   | C3   | 1.397(2)   |  | C26  | C27  | 1.392(2)   |
| C3   | C13  | 1.4998(19) |  | C26  | C31  | 1.510(2)   |
| C4   | C5   | 1.403(2)   |  | C27  | C28  | 1.392(2)   |
| C4   | C9   | 1.403(2)   |  | C28  | C29  | 1.388(2)   |
| C5   | C6   | 1.392(2)   |  | C28  | C32  | 1.508(2)   |
| C5   | C10  | 1.509(2)   |  | C29  | C30  | 1.399(2)   |
| C6   | C7   | 1.389(2)   |  | C30  | C33  | 1.515(2)   |
| C7   | C8   | 1.387(3)   |  | C34  | C35  | 1.401(2)   |
| C7   | C11  | 1.508(2)   |  | C34  | C39  | 1.402(2)   |
| C8   | C9   | 1.393(2)   |  | C35  | C36  | 1.396(2)   |
| C9   | C12  | 1.508(2)   |  | C35  | C40  | 1.509(2)   |
| C13  | C14  | 1.403(2)   |  | C36  | C37  | 1.393(2)   |
| C13  | C18  | 1.403(2)   |  | C37  | C38  | 1.387(2)   |
| C14  | C15  | 1.389(2)   |  | C37  | C41  | 1.506(2)   |
| C14  | C19  | 1.512(2)   |  | C38  | C39  | 1.397(2)   |
| C15  | C16  | 1.393(2)   |  | C39  | C42  | 1.503(2)   |

**Table S6.** Bond Angles for [Zn(L<sup>Mes</sup>)<sub>2</sub>] (**12**).

| Atom | Atom | Atom | Angle/°    |  | Atom | Atom | Atom | Angle/°    |
|------|------|------|------------|--|------|------|------|------------|
| O1   | Zn   | O4   | 111.67(5)  |  | C17  | C16  | C20  | 121.06(14) |
| O2   | Zn   | O1   | 95.78(4)   |  | C16  | C17  | C18  | 121.51(14) |
| O2   | Zn   | O3   | 123.15(5)  |  | C13  | C18  | C21  | 121.84(13) |
| O2   | Zn   | O4   | 117.02(5)  |  | C17  | C18  | C13  | 118.76(14) |
| O3   | Zn   | O1   | 111.70(5)  |  | C17  | C18  | C21  | 119.40(14) |
| O3   | Zn   | O4   | 98.06(4)   |  | O3   | C22  | C23  | 125.50(13) |
| C1   | O1   | Zn   | 123.74(10) |  | O3   | C22  | C25  | 116.10(12) |
| C3   | O2   | Zn   | 123.03(10) |  | C23  | C22  | C25  | 118.39(12) |
| C22  | O3   | Zn   | 121.54(9)  |  | C24  | C23  | C22  | 126.90(13) |
| C24  | O4   | Zn   | 120.57(9)  |  | O4   | C24  | C23  | 126.52(13) |
| O1   | C1   | C2   | 125.06(13) |  | O4   | C24  | C34  | 116.91(12) |
| O1   | C1   | C4   | 114.77(13) |  | C23  | C24  | C34  | 116.53(12) |
| C2   | C1   | C4   | 120.17(12) |  | C26  | C25  | C22  | 119.12(13) |
| C3   | C2   | C1   | 125.68(13) |  | C26  | C25  | C30  | 119.94(13) |
| O2   | C3   | C2   | 126.28(13) |  | C30  | C25  | C22  | 120.94(13) |
| O2   | C3   | C13  | 114.54(12) |  | C25  | C26  | C31  | 122.19(13) |
| C2   | C3   | C13  | 119.16(12) |  | C27  | C26  | C25  | 118.89(13) |
| C5   | C4   | C1   | 118.14(13) |  | C27  | C26  | C31  | 118.92(13) |
| C9   | C4   | C1   | 121.07(13) |  | C28  | C27  | C26  | 122.19(13) |
| C9   | C4   | C5   | 120.72(14) |  | C27  | C28  | C32  | 120.62(14) |
| C4   | C5   | C10  | 121.97(14) |  | C29  | C28  | C27  | 118.07(13) |
| C6   | C5   | C4   | 118.92(14) |  | C29  | C28  | C32  | 121.30(14) |
| C6   | C5   | C10  | 119.10(15) |  | C28  | C29  | C30  | 121.86(14) |
| C7   | C6   | C5   | 121.48(15) |  | C25  | C30  | C33  | 123.18(13) |
| C6   | C7   | C11  | 120.48(17) |  | C29  | C30  | C25  | 118.98(13) |
| C8   | C7   | C6   | 118.45(15) |  | C29  | C30  | C33  | 117.82(13) |
| C8   | C7   | C11  | 121.05(17) |  | C35  | C34  | C24  | 118.33(13) |
| C7   | C8   | C9   | 122.28(15) |  | C35  | C34  | C39  | 121.03(13) |
| C4   | C9   | C12  | 122.64(14) |  | C39  | C34  | C24  | 120.59(13) |
| C8   | C9   | C4   | 118.14(15) |  | C34  | C35  | C40  | 121.12(14) |
| C8   | C9   | C12  | 119.20(15) |  | C36  | C35  | C34  | 118.54(14) |
| C14  | C13  | C3   | 118.37(13) |  | C36  | C35  | C40  | 120.34(14) |
| C18  | C13  | C3   | 120.93(13) |  | C37  | C36  | C35  | 121.61(15) |
| C18  | C13  | C14  | 120.66(13) |  | C36  | C37  | C41  | 120.76(16) |
| C13  | C14  | C19  | 121.12(13) |  | C38  | C37  | C36  | 118.53(14) |
| C15  | C14  | C13  | 118.70(14) |  | C38  | C37  | C41  | 120.70(15) |
| C15  | C14  | C19  | 120.16(14) |  | C37  | C38  | C39  | 121.90(14) |
| C14  | C15  | C16  | 121.90(14) |  | C34  | C39  | C42  | 121.33(14) |
| C15  | C16  | C17  | 118.43(14) |  | C38  | C39  | C34  | 118.31(14) |
| C15  | C16  | C20  | 120.50(14) |  | C38  | C39  | C42  | 120.33(14) |



| <b>Table S7.</b> Crystal data and structure refinement for [Cu(L <sup>CF3</sup> ) <sub>2</sub> (THF)]·2(THF). |                                                                  |
|---------------------------------------------------------------------------------------------------------------|------------------------------------------------------------------|
| Identification code                                                                                           | dia95_0m_a                                                       |
| Empirical formula                                                                                             | C <sub>50</sub> H <sub>38</sub> CuF <sub>24</sub> O <sub>7</sub> |
| Formula weight                                                                                                | 1270.34                                                          |
| Temperature/K                                                                                                 | 200.07                                                           |
| Crystal system                                                                                                | triclinic                                                        |
| Space group                                                                                                   | P-1                                                              |
| a/Å                                                                                                           | 12.980(4)                                                        |
| b/Å                                                                                                           | 13.172(4)                                                        |
| c/Å                                                                                                           | 17.416(5)                                                        |
| α/°                                                                                                           | 69.511(4)                                                        |
| β/°                                                                                                           | 75.588(4)                                                        |
| γ/°                                                                                                           | 75.482(5)                                                        |
| Volume/Å <sup>3</sup>                                                                                         | 2657.3(13)                                                       |
| Z                                                                                                             | 2                                                                |
| ρ <sub>calc</sub> /g/cm <sup>3</sup>                                                                          | 1.588                                                            |
| μ/mm <sup>-1</sup>                                                                                            | 0.545                                                            |
| F(000)                                                                                                        | 1278.0                                                           |
| Crystal size/mm <sup>3</sup>                                                                                  | 0.305 × 0.145 × 0.139                                            |
| Radiation                                                                                                     | Mo Kα (λ = 0.71073)                                              |
| 2θ range for data collection/°                                                                                | 2.536 to 58.298                                                  |
| Index ranges                                                                                                  | -17 ≤ h ≤ 17, -18 ≤ k ≤ 17, -23 ≤ l ≤ 23                         |
| Reflections collected                                                                                         | 29871                                                            |
| Independent reflections                                                                                       | 14217 [R <sub>int</sub> = 0.0192, R <sub>sigma</sub> = 0.0318]   |
| Data/restraints/parameters                                                                                    | 14217/714/1077                                                   |
| Goodness-of-fit on F <sup>2</sup>                                                                             | 1.045                                                            |
| Final R indexes [ >=2σ (I)]                                                                                   | R <sub>1</sub> = 0.0488, wR <sub>2</sub> = 0.1371                |
| Final R indexes [all data]                                                                                    | R <sub>1</sub> = 0.0779, wR <sub>2</sub> = 0.1548                |
| Largest diff. peak/hole / e Å <sup>-3</sup>                                                                   | 0.43/-0.27                                                       |

**Table S8.** Bond Lengths for [Cu(L<sup>CF3</sup>)<sub>2</sub>(THF)]·2(THF).

| Atom | Atom | Length/Å   |  | Atom | Atom | Length/Å  |
|------|------|------------|--|------|------|-----------|
| Cu1  | O1   | 1.9239(14) |  | C29  | F13  | 1.305(7)  |
| Cu1  | O2   | 1.9221(14) |  | C29  | F14  | 1.311(7)  |
| Cu1  | O3   | 1.9207(13) |  | C29  | F15  | 1.293(6)  |
| Cu1  | O4   | 1.9200(13) |  | C29  | F13A | 1.285(11) |
| Cu1  | O5   | 2.323(2)   |  | C29  | F14A | 1.318(8)  |
| F4   | C11  | 1.328(3)   |  | C29  | F15A | 1.280(8)  |
| F5   | C11  | 1.336(3)   |  | C30  | F16  | 1.526(6)  |
| F6   | C11  | 1.318(3)   |  | C30  | F17  | 1.259(6)  |
| F7   | C18  | 1.319(3)   |  | C30  | F18  | 1.242(6)  |
| F8   | C18  | 1.332(3)   |  | C30  | F16A | 1.205(8)  |
| F9   | C18  | 1.320(3)   |  | C30  | F17A | 1.249(7)  |
| O1   | C1   | 1.264(2)   |  | C30  | F18A | 1.627(7)  |
| O2   | C3   | 1.272(2)   |  | C31  | C32  | 1.394(2)  |
| O3   | C20  | 1.265(2)   |  | C31  | C36  | 1.388(3)  |
| O4   | C22  | 1.272(2)   |  | C32  | C33  | 1.389(3)  |
| O5   | C51  | 1.456(9)   |  | C33  | C34  | 1.381(3)  |
| O5   | C54  | 1.466(8)   |  | C33  | C37  | 1.484(3)  |
| O5   | C39  | 1.375(8)   |  | C34  | C35  | 1.385(3)  |
| O5   | C42  | 1.377(9)   |  | C35  | C36  | 1.389(3)  |
| C1   | C2   | 1.403(3)   |  | C35  | C38  | 1.499(3)  |
| C1   | C4   | 1.501(3)   |  | C37  | F19  | 1.219(5)  |
| C2   | C3   | 1.401(3)   |  | C37  | F20  | 1.494(5)  |
| C3   | C12  | 1.502(3)   |  | C37  | F21  | 1.283(4)  |
| C4   | C5   | 1.394(3)   |  | C37  | F19A | 1.577(7)  |
| C4   | C9   | 1.397(3)   |  | C37  | F20A | 1.221(7)  |
| C5   | C6   | 1.388(3)   |  | C37  | F21A | 1.255(8)  |
| C6   | C7   | 1.389(3)   |  | C38  | F22  | 1.324(5)  |
| C6   | C10  | 1.496(4)   |  | C38  | F23  | 1.296(5)  |
| C7   | C8   | 1.377(3)   |  | C38  | F24  | 1.258(6)  |
| C8   | C9   | 1.388(3)   |  | C38  | F22A | 1.286(6)  |
| C8   | C11  | 1.498(3)   |  | C38  | F23A | 1.259(8)  |
| C10  | F1   | 1.302(6)   |  | C38  | F24A | 1.324(7)  |
| C10  | F2   | 1.238(6)   |  | C51  | C52  | 1.542(11) |
| C10  | F3   | 1.417(5)   |  | C52  | C53  | 1.459(9)  |
| C10  | F1A  | 1.423(6)   |  | C53  | C54  | 1.523(11) |
| C10  | F2A  | 1.285(6)   |  | O6   | C1I  | 1.456(13) |
| C10  | F3A  | 1.179(6)   |  | O6   | C1L  | 1.425(14) |
| C12  | C13  | 1.400(3)   |  | C1I  | C1J  | 1.519(11) |
| C12  | C17  | 1.388(3)   |  | C1J  | C1K  | 1.505(12) |
| C13  | C14  | 1.391(3)   |  | C1K  | C1L  | 1.519(12) |
| C14  | C15  | 1.378(3)   |  | O7   | C1M  | 1.419(8)  |
| C14  | C18  | 1.509(3)   |  | O7   | C1P  | 1.440(11) |
| C15  | C16  | 1.390(3)   |  | C1M  | C1N  | 1.496(10) |
| C16  | C17  | 1.391(3)   |  | C1N  | C1O  | 1.554(10) |
| C16  | C19  | 1.500(3)   |  | C1O  | C1P  | 1.523(11) |
| C19  | F10  | 1.257(5)   |  | O8   | C1A  | 1.455(13) |
| C19  | F11  | 1.323(5)   |  | O8   | C1D  | 1.423(13) |
| C19  | F12  | 1.413(4)   |  | O9   | C1E  | 1.437(12) |
| C19  | F10A | 1.303(5)   |  | O9   | C1H  | 1.442(11) |
| C19  | F11A | 1.416(5)   |  | C1A  | C1B  | 1.569(13) |
| C19  | F12A | 1.194(5)   |  | C1B  | C1C  | 1.545(14) |
| C20  | C21  | 1.398(3)   |  | C1C  | C1D  | 1.555(13) |
| C20  | C23  | 1.507(2)   |  | C1E  | C1F  | 1.519(11) |
| C21  | C22  | 1.392(3)   |  | C1F  | C1G  | 1.548(11) |
| C22  | C31  | 1.503(2)   |  | C1G  | C1H  | 1.482(11) |

|     |     |          |  |     |     |           |
|-----|-----|----------|--|-----|-----|-----------|
| C23 | C24 | 1.386(3) |  | C39 | C40 | 1.528(11) |
| C23 | C28 | 1.391(3) |  | C40 | C41 | 1.411(9)  |
| C24 | C25 | 1.392(3) |  | C41 | C42 | 1.552(12) |
| C25 | C26 | 1.382(3) |  | O10 | C1Q | 1.425(14) |
| C25 | C29 | 1.502(3) |  | O10 | C1T | 1.407(14) |
| C26 | C27 | 1.376(3) |  | C1Q | C1R | 1.565(14) |
| C27 | C28 | 1.391(3) |  | C1R | C1S | 1.541(14) |
| C27 | C30 | 1.496(3) |  | C1S | C1T | 1.571(14) |

**Table S9.** Bond Angles for [Cu(L<sup>CF3</sup>)<sub>2</sub>(THF)]<sub>2</sub>(THF).

| Atom | Atom | Atom | Angle/°    | Atom | Atom | Atom | Angle/°    |
|------|------|------|------------|------|------|------|------------|
| O1   | Cu1  | O5   | 90.54(8)   | C26  | C25  | C29  | 118.64(19) |
| O2   | Cu1  | O1   | 93.12(6)   | C27  | C26  | C25  | 119.09(19) |
| O2   | Cu1  | O5   | 89.81(8)   | C26  | C27  | C28  | 121.0(2)   |
| O3   | Cu1  | O1   | 86.67(6)   | C26  | C27  | C30  | 120.0(2)   |
| O3   | Cu1  | O2   | 175.67(7)  | C28  | C27  | C30  | 119.1(2)   |
| O3   | Cu1  | O5   | 94.52(8)   | C27  | C28  | C23  | 119.9(2)   |
| O4   | Cu1  | O1   | 176.08(7)  | F13  | C29  | C25  | 114.5(4)   |
| O4   | Cu1  | O2   | 86.49(6)   | F13  | C29  | F14  | 103.5(8)   |
| O4   | Cu1  | O3   | 93.42(6)   | F14  | C29  | C25  | 112.5(5)   |
| O4   | Cu1  | O5   | 93.36(8)   | F15  | C29  | C25  | 113.7(4)   |
| C1   | O1   | Cu1  | 126.00(12) | F15  | C29  | F13  | 108.6(7)   |
| C3   | O2   | Cu1  | 125.99(13) | F15  | C29  | F14  | 103.0(5)   |
| C20  | O3   | Cu1  | 125.79(12) | F13A | C29  | C25  | 113.4(7)   |
| C22  | O4   | Cu1  | 125.73(12) | F13A | C29  | F14A | 108.2(10)  |
| C51  | O5   | Cu1  | 122.7(4)   | F14A | C29  | C25  | 110.6(7)   |
| C51  | O5   | C54  | 101.5(6)   | F15A | C29  | C25  | 111.9(6)   |
| C54  | O5   | Cu1  | 121.1(3)   | F15A | C29  | F13A | 109.3(11)  |
| C39  | O5   | Cu1  | 127.3(4)   | F15A | C29  | F14A | 103.0(9)   |
| C39  | O5   | C42  | 104.4(6)   | C27  | C30  | F16  | 105.9(3)   |
| C42  | O5   | Cu1  | 127.3(4)   | C27  | C30  | F18A | 100.9(3)   |
| O1   | C1   | C2   | 125.36(17) | F17  | C30  | C27  | 115.1(5)   |
| O1   | C1   | C4   | 114.86(16) | F17  | C30  | F16  | 98.0(5)    |
| C2   | C1   | C4   | 119.75(16) | F18  | C30  | C27  | 116.4(4)   |
| C3   | C2   | C1   | 123.87(17) | F18  | C30  | F16  | 98.0(6)    |
| O2   | C3   | C2   | 125.09(17) | F18  | C30  | F17  | 118.6(6)   |
| O2   | C3   | C12  | 114.64(16) | F16A | C30  | C27  | 119.7(5)   |
| C2   | C3   | C12  | 120.26(16) | F16A | C30  | F17A | 122.4(7)   |
| C5   | C4   | C1   | 117.76(17) | F16A | C30  | F18A | 91.7(6)    |
| C5   | C4   | C9   | 118.86(18) | F17A | C30  | C27  | 116.2(5)   |
| C9   | C4   | C1   | 123.32(18) | F17A | C30  | F18A | 90.5(6)    |
| C6   | C5   | C4   | 120.2(2)   | C32  | C31  | C22  | 122.14(16) |
| C5   | C6   | C7   | 120.7(2)   | C36  | C31  | C22  | 118.90(16) |
| C5   | C6   | C10  | 119.7(2)   | C36  | C31  | C32  | 118.94(17) |
| C7   | C6   | C10  | 119.7(2)   | C33  | C32  | C31  | 120.31(18) |
| C8   | C7   | C6   | 119.12(19) | C32  | C33  | C37  | 119.07(19) |
| C7   | C8   | C9   | 121.0(2)   | C34  | C33  | C32  | 120.60(18) |
| C7   | C8   | C11  | 119.7(2)   | C34  | C33  | C37  | 120.32(19) |
| C9   | C8   | C11  | 119.2(2)   | C33  | C34  | C35  | 119.19(18) |
| C8   | C9   | C4   | 120.1(2)   | C34  | C35  | C36  | 120.69(18) |
| F1   | C10  | C6   | 115.0(3)   | C34  | C35  | C38  | 118.67(18) |
| F1   | C10  | F3   | 99.3(4)    | C36  | C35  | C38  | 120.63(19) |
| F2   | C10  | C6   | 114.4(4)   | C31  | C36  | C35  | 120.26(17) |
| F2   | C10  | F1   | 111.8(7)   | C33  | C37  | F20  | 105.4(3)   |
| F2   | C10  | F3   | 103.1(5)   | C33  | C37  | F19A | 102.3(3)   |
| F3   | C10  | C6   | 111.5(3)   | F19  | C37  | C33  | 117.7(3)   |
| F1A  | C10  | C6   | 106.5(3)   | F19  | C37  | F20  | 101.4(4)   |
| F2A  | C10  | C6   | 113.4(5)   | F19  | C37  | F21  | 116.0(5)   |
| F2A  | C10  | F1A  | 95.5(5)    | F21  | C37  | C33  | 114.5(3)   |
| F3A  | C10  | C6   | 116.3(4)   | F21  | C37  | F20  | 97.9(4)    |
| F3A  | C10  | F1A  | 104.4(7)   | F20A | C37  | C33  | 119.3(5)   |
| F3A  | C10  | F2A  | 117.3(6)   | F20A | C37  | F19A | 92.2(7)    |
| F4   | C11  | F5   | 105.7(2)   | F20A | C37  | F21A | 117.7(8)   |
| F4   | C11  | C8   | 113.0(2)   | F21A | C37  | C33  | 120.3(6)   |
| F5   | C11  | C8   | 111.6(2)   | F21A | C37  | F19A | 91.8(7)    |
| F6   | C11  | F4   | 105.8(2)   | F22  | C38  | C35  | 113.6(3)   |

|      |     |      |            |  |      |     |      |           |
|------|-----|------|------------|--|------|-----|------|-----------|
| F6   | C11 | F5   | 107.3(2)   |  | F23  | C38 | C35  | 112.7(4)  |
| F6   | C11 | C8   | 113.0(2)   |  | F23  | C38 | F22  | 103.2(6)  |
| C13  | C12 | C3   | 122.54(17) |  | F24  | C38 | C35  | 113.6(4)  |
| C17  | C12 | C3   | 117.99(16) |  | F24  | C38 | F22  | 109.5(6)  |
| C17  | C12 | C13  | 119.38(17) |  | F24  | C38 | F23  | 103.3(5)  |
| C14  | C13 | C12  | 119.45(19) |  | F22A | C38 | C35  | 111.8(4)  |
| C13  | C14 | C18  | 118.6(2)   |  | F22A | C38 | F24A | 98.5(7)   |
| C15  | C14 | C13  | 121.44(19) |  | F23A | C38 | C35  | 114.3(6)  |
| C15  | C14 | C18  | 119.95(19) |  | F23A | C38 | F22A | 112.0(7)  |
| C14  | C15 | C16  | 118.83(18) |  | F23A | C38 | F24A | 107.2(8)  |
| C15  | C16 | C17  | 120.7(2)   |  | F24A | C38 | C35  | 111.9(5)  |
| C15  | C16 | C19  | 119.52(19) |  | O5   | C51 | C52  | 99.7(7)   |
| C17  | C16 | C19  | 119.8(2)   |  | C53  | C52 | C51  | 105.5(7)  |
| C12  | C17 | C16  | 120.20(19) |  | C52  | C53 | C54  | 104.8(7)  |
| F7   | C18 | F8   | 105.8(2)   |  | O5   | C54 | C53  | 101.1(7)  |
| F7   | C18 | F9   | 107.0(2)   |  | C1L  | O6  | C1I  | 109.8(14) |
| F7   | C18 | C14  | 112.93(19) |  | O6   | C1I | C1J  | 102.0(11) |
| F8   | C18 | C14  | 111.3(2)   |  | C1K  | C1J | C1I  | 107.9(9)  |
| F9   | C18 | F8   | 107.3(2)   |  | C1J  | C1K | C1L  | 103.2(10) |
| F9   | C18 | C14  | 112.2(2)   |  | O6   | C1L | C1K  | 102.0(12) |
| F10  | C19 | C16  | 115.3(3)   |  | C1M  | O7  | C1P  | 109.9(9)  |
| F10  | C19 | F11  | 111.3(5)   |  | O7   | C1M | C1N  | 106.5(8)  |
| F10  | C19 | F12  | 102.8(4)   |  | C1M  | C1N | C1O  | 102.6(7)  |
| F11  | C19 | C16  | 115.7(2)   |  | C1P  | C1O | C1N  | 98.8(8)   |
| F11  | C19 | F12  | 98.4(4)    |  | O7   | C1P | C1O  | 104.9(8)  |
| F12  | C19 | C16  | 111.3(3)   |  | C1D  | O8  | C1A  | 104.6(12) |
| F10A | C19 | C16  | 111.4(3)   |  | C1E  | O9  | C1H  | 106.5(11) |
| F10A | C19 | F11A | 99.3(4)    |  | O8   | C1A | C1B  | 103.2(12) |
| F11A | C19 | C16  | 108.0(3)   |  | C1C  | C1B | C1A  | 89.9(13)  |
| F12A | C19 | C16  | 114.0(3)   |  | C1B  | C1C | C1D  | 92.3(12)  |
| F12A | C19 | F10A | 116.4(5)   |  | O8   | C1D | C1C  | 102.5(11) |
| F12A | C19 | F11A | 106.0(5)   |  | O9   | C1E | C1F  | 106.1(11) |
| O3   | C20 | C21  | 125.18(17) |  | C1E  | C1F | C1G  | 98.3(9)   |
| O3   | C20 | C23  | 114.87(16) |  | C1H  | C1G | C1F  | 105.9(9)  |
| C21  | C20 | C23  | 119.95(16) |  | O9   | C1H | C1G  | 107.5(10) |
| C22  | C21 | C20  | 124.43(17) |  | O5   | C39 | C40  | 103.5(7)  |
| O4   | C22 | C21  | 125.09(17) |  | C41  | C40 | C39  | 104.1(8)  |
| O4   | C22 | C31  | 114.59(15) |  | C40  | C41 | C42  | 104.5(8)  |
| C21  | C22 | C31  | 120.32(16) |  | O5   | C42 | C41  | 101.3(8)  |
| C24  | C23 | C20  | 118.39(16) |  | C1T  | O10 | C1Q  | 116.3(19) |
| C24  | C23 | C28  | 119.19(17) |  | O10  | C1Q | C1R  | 98.4(13)  |
| C28  | C23 | C20  | 122.41(17) |  | C1S  | C1R | C1Q  | 100.4(12) |
| C23  | C24 | C25  | 120.14(19) |  | C1R  | C1S | C1T  | 96.8(14)  |
| C24  | C25 | C29  | 120.7(2)   |  | O10  | C1T | C1S  | 91.6(14)  |
| C26  | C25 | C24  | 120.7(2)   |  |      |     |      |           |
